# Supplementary material for: Pancreatic stone protein (PSP) and pancreatitis-associated protein (PAP): a protocol of a cohort study on the diagnostic efficacy and prognostic value of PSP and PAP as postoperative markers of septic complications in patients undergoing abdominal surgery (PSP study)
Source: PubMed Central journal article supplement — BMJ Open. 2014 Mar 6;4(3):e004914. doi: 10.1136/bmjopen-2014-004914 (PMC3948573; doi:10.1136/bmjopen-2014-004914), 2014-03-06
Supplement: bmjopen-2014-004914.draft_revisions.pdf [file bmjopen-2014-004914.draft_revisions.pdf]

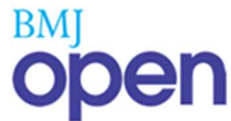

**Pancreatic Stone Protein and Pancreatitis-associated Protein: Diagnostic Efficacy and Prognostic Value of PSP and PAP as Postoperative Markers of Septic Complications in Patients Undergoing Abdominal Surgery – A Prospective Trial (PSP-Trial)**

|                                 |                                                                                                                                                                                                                                                                                                                                                                                                                                                                                                                    |
|---------------------------------|--------------------------------------------------------------------------------------------------------------------------------------------------------------------------------------------------------------------------------------------------------------------------------------------------------------------------------------------------------------------------------------------------------------------------------------------------------------------------------------------------------------------|
| Journal:                        | <i>BMJ Open</i>                                                                                                                                                                                                                                                                                                                                                                                                                                                                                                    |
| Manuscript ID:                  | bmjopen-2014-004914                                                                                                                                                                                                                                                                                                                                                                                                                                                                                                |
| Article Type:                   | Protocol                                                                                                                                                                                                                                                                                                                                                                                                                                                                                                           |
| Date Submitted by the Author:   | 23-Jan-2014                                                                                                                                                                                                                                                                                                                                                                                                                                                                                                        |
| Complete List of Authors:       | Fisher, Oliver; University Hospital Zurich, Department of Surgery<br>Oberkofler, Christian; University Hospital Zurich, Department of Surgery<br>Raptis, Dimitri; University Hospital Zurich, Department of Surgery<br>Soll, Christopher; Cantonal Hospital Winterthur, Department of Surgery<br>Béchir, Markus; University Hospital Zurich, Surgical Intensive Care Unit<br>Schiesser, Marc; Cantonal Hospital St. Gallen, Department of Surgery<br>Graf, Rolf; University Hospital Zurich, Department of Surgery |
| <b>Primary Subject Heading</b>: | Surgery                                                                                                                                                                                                                                                                                                                                                                                                                                                                                                            |
| Secondary Subject Heading:      | Surgery, Infectious diseases, Intensive care                                                                                                                                                                                                                                                                                                                                                                                                                                                                       |
| Keywords:                       | Adult surgery < SURGERY, Gastrointestinal infections < GASTROENTEROLOGY, Infection control < INFECTIOUS DISEASES, Colorectal surgery < SURGERY, Hepatobiliary surgery < SURGERY, Transplant surgery < SURGERY                                                                                                                                                                                                                                                                                                      |
|                                 |                                                                                                                                                                                                                                                                                                                                                                                                                                                                                                                    |

SCHOLARONE™  
Manuscripts

1  
2  
3  
4  
5  
6  
7  
8  
9  
10  
11  
12

**Pancreatic Stone Protein and Pancreatitis-associated Protein:  
Diagnostic Efficacy and Prognostic Value of PSP and PAP as  
Postoperative Markers of Septic Complications in Patients  
Undergoing Abdominal Surgery – A Prospective Trial  
(PSP-Trial)**

13  
14 Oliver Maximilian Fisher, MD<sup>1†</sup>, Christian Eugen Oberkofler, MD<sup>1†</sup>, Dimitri Aristotle Raptis,  
15 MD<sup>1</sup>, Christopher Soll, MD<sup>2</sup>, Markus Béchir, MD<sup>3</sup>, Marc Schiesser, MD, MS<sup>4</sup>, Rolf Graf,  
16 PhD<sup>1\*</sup>

17  
18 \* Corresponding Author

19 Prof. Rolf Graf, PhD

20 Department of Surgery

21 Pancreatitis Laboratory DL 34

22 University Hospital Zurich

23 Sternwartstrasse 14

24 CH-8091 Switzerland

25 Phone: +41 44 255 20 71

26 Fax: +41 44 255 50 47

27 Email: rolf.graf@usz.ch  
28  
29  
30

31  
32 <sup>1</sup> Department of Surgery, University Hospital Zurich, Raemistrasse 100, Zurich  
33 CH-8091, Switzerland

34  
35 <sup>2</sup> Department of Surgery, Cantonal Hospital Winterthur, Brauerstrasse 15, Winterthur CH-  
36 8401, Switzerland

37  
38 <sup>3</sup> Surgical Intensive Care Unit, University Hospital Zurich, Raemistrasse 100, Zurich CH-  
39 8091, Switzerland

40  
41 <sup>4</sup> Department of Surgery, Cantonal Hospital St. Gallen, Rorschacherstrasse 95, St. Gallen CH-  
42 9007, Switzerland  
43  
44

45 <sup>†</sup> **Equal contributors**

46  
47 **Keywords:** pancreatic stone protein, pancreatitis associated protein, secretory stress protein,  
48 abdominal surgery, sepsis

49 **Word count:** 1941  
50  
51  
52  
53  
54  
55  
56  
57  
58  
59  
60

**Abstract:** Introduction. Major abdominal surgery leads to a postoperative systemic inflammatory response, making it difficult to discriminate patients with SIRS from those with a beginning postoperative infectious complication. To date, physicians still have to rely on their clinical experience to differ between the two. Pancreatic stone protein (PSP) and pancreatitis-associated protein (PAP), both secretory proteins produced by the pancreas, are dramatically increased during pancreatic disease and have been shown to act as acute-phase proteins. Increased levels of PSP have been detected in polytrauma patients developing sepsis and PSP has shown a high diagnostic accuracy in discriminating the severity of peritonitis and in predicting death in ICU patients. However, the prognostic value of PSP/PAP for infectious complications among patients undergoing major abdominal surgery is unknown.

**Methods & Analysis.** 160 patients undergoing major abdominal surgery will be recruited preoperatively. On the day before surgery, baseline blood values are attained. Following surgery, daily blood samples for measuring regular inflammation markers (C-reactive protein, procalcitonin, interleukin-6, TNF-alpha, leucocyte counts) and PSP/PAP will be acquired. PSP/PAP will be measured using a validated ELISA developed in our research laboratory. Patient discharge marks the end of trial participation. Complication grade including mortality and occurrence of infectious postoperative complications according to validated diagnostic criteria will be correlated with PSP/PAP values. Total intensive care unit day and total length of stay will be recorded as further outcome parameters.

**Objectives.** The PSP-Trial is a prospective monocentric cohort study evaluating the prognostic value of pancreatic stone protein (PSP) and pancreatitis associated protein (PAP) for postoperative infectious complications. Additionally, a comparison with established inflammation markers in patients undergoing major abdominal surgery will be performed to help evaluate the role of these proteins in predicting and diagnosing infectious and other postoperative complications.

**Ethics.** Institution Ethics Board Approval ID: KEKZH-Nr. STV 11-2009

**Trial Registration.** ClinicalTrials.gov: NCT01258179

#### **STRENGTHS:**

- Assessment of the novel sepsis biomarkers PSP/PAP in an abdominal surgical study population
- Comparison of PSP/PAP to other acute-phase reaction proteins, regularly measured in surgical study populations
- Evaluation of ability of PSP/PAP to predict infectious complications in patients undergoing major abdominal surgery
- Evaluation of ability of PSP/PAP to predict postoperative sepsis in patients undergoing major abdominal surgery (independently and in comparison to other inflammatory markers)
- External validation of PSP/PAP as a sepsis marker in an independent, prospective patient cohort

#### **LIMITATIONS:**

- Limited ability to generalize to other surgical or medical patient populations

1  
2  
3  
4  
5  
6  
7  
8  
9  
10  
11  
12  
13  
14  
15  
16  
17  
18  
19  
20  
21  
22  
23  
24  
25  
26  
27  
28  
29  
30  
31  
32  
33  
34  
35  
36  
37  
38  
39  
40  
41  
42  
43  
44  
45  
46  
47  
48  
49  
50  
51  
52  
53  
54  
55  
56  
57  
58  
59  
60

- Limited ability to determine role in guiding treatment decisions
- Non-blinded, non-randomized controlled trial

For peer review only

## BACKGROUND & CURRENT KNOWLEDGE

The acute-phase reaction is a systemic, non-specific response of the organism to acute inflammation, infection, and also occurs after surgery and the acute-phase reaction is associated with changes in the plasma protein profile<sup>1</sup>. Endothelial cells, fibroblasts and inflammatory cells such as macrophages secrete endogenous immune mediators in the damaged tissue, such as Interleukin-1 (IL-1), interleukin-6 (IL-6), interferon- $\gamma$  and tumor necrosis factor alpha (TNF- $\alpha$ ). In the presence of cortisol this results in the induction of synthesis of various acute-phase proteins stemming from the liver<sup>2</sup>. These include C-reactive protein (CRP), serum amyloid A (SAA), fibrinogen and the complement C3<sup>3</sup>. These proteins can be used as outcome measures of the acute-phase reaction<sup>3</sup> and have been established in clinical practice. Prolonged increase of acute-phase proteins has been shown to be predictive for postoperative infections and septic complications<sup>4,5</sup>. Additionally, studies have shown, that inflammatory markers such as TNF, IL-10 and IL-6 play an important role in the pathogenesis of postoperative SIRS<sup>6</sup>. But acute-phase proteins aren't only synthesized in the liver. It has been shown that the pancreas increases production of pancreatic secretory proteins such as pancreatitis associated protein (PAP) and the pancreatic stone protein/regenerating protein (PSP/reg), known as secretory stress proteins (SSP)<sup>7,8</sup>. In previous work, our group has shown an increased production and secretion of SSPs in stress induction of a murine pancreatitis-model (WBN / Kob rat)<sup>9,10</sup>. Another group was able to demonstrate a correlation between the course of pancreatitis and the induction of pancreatic secretory stress proteins<sup>11</sup>. However, it has also been demonstrated that both PAP and PSP are secreted in other organs, such as the small intestine<sup>12,13</sup>. PAP was increased under inflammatory conditions of the small intestine, especially in celiac disease<sup>13</sup>. More recently, it was demonstrated that PAP is involved in wound healing processes and it's associated metalloproteinases<sup>14</sup>.

In a clinical study in polytrauma patients a significant increase of PSP was observed in those patients who developed infections or sepsis<sup>15</sup>. The same study showed that PSP binds and activates neutrophils, thus acting as an acute-phase protein. The concept that PSP is an early marker of sepsis was further confirmed in subsequent studies on patient populations admitted to the ICU<sup>16-18</sup>.

Therefore it seems clear, that PAP and PSP play an important role in various inflammatory events, not only in pancreatitis but also in sepsis subsequent to other inflammatory diseases. However to date, no perioperative study exist, which looks at the value of these proteins and their role as postoperative inflammatory serum markers following major abdominal surgery. Additionally, differentiating between a simple inflammatory response and a true infectious complication following abdominal surgery still remains a challenge in clinical practice. Here, PAP and PSP/reg may provide valuable information and aid in differentiating between both events in the postoperative setting.

## METHODS & STUDY DESIGN

The PSP-Trial is a prospective, monocentric cohort study evaluating the role of Pancreatic Stone Protein (PSP) and Pancreatitis Associated Protein (PAP) as new markers for postoperative infectious complications following abdominal surgery. Our study population will consist of patients undergoing liver (n = 30), pancreas (n = 30), upper gastrointestinal tract (n=30) and lower gastrointestinal tract (n=30) surgery as well as patients undergoing emergency abdominal procedures (n=20) and patients undergoing combined renal/pancreas-transplantation (n=10). Hence, a total of 160 patients will be recruited. To ensure adequate data quality, an interim analysis will be performed once 80 patients have been recruited. A power analysis will be performed based on the actual and precise data collected. At interim analysis the potential need to modify the sample size will be investigated. If the external data monitoring committee suggests any changes based on these calculations, the principal investigators will decide on the feasibility of the potential changes and submit a formal addendum to the ethics committee. Unless first approved by the local ethics committee, no changes will be made to the protocol or study design. Any changes to the protocol approved by the ethics committee will be updated at [clinicaltrials.gov](http://clinicaltrials.gov) [NCT01258179].

## STUDY OBJECTIVES & ENDPOINTS

### Study objectives

1. To determine serum levels of PAP and PSP/reg attained from venous samples of patients undergoing major abdominal surgery.
2. To determine an association between PSP/PAP expression and current, routinely measured inflammatory markers (C-reactive protein, procalcitonin, TNF-alpha, IL-6, white blood cell count, thrombocyte count) and compare these with regards to predicting postoperative complications?
3. To determine, whether PSP/PAP levels correlate with postoperative infectious complications and general postoperative complications as graded by the validated Clavien-Dindo classification for postoperative surgical complications<sup>19</sup>?
4. To determine if PSP/PAP can be used as a predictive marker for postoperative infectious complications and sepsis?

### Endpoints

#### Primary Endpoint

- Association of PSP/PAP expression values with patients experiencing infectious postoperative complication according to the Systemic Inflammatory Response Syndrome (SIRS) and Sepsis Criteria of the German Interdisciplinary Association of Intensive and Emergency Medicine (DIVI) and the ACCP/SCCM Consensus Conference Criteria<sup>20,21</sup>.

#### Secondary Endpoints

- Correlation/comparison of PSP/PAP expression values to current markers of inflammation in patients undergoing major abdominal surgery.
- Association of PSP/PAP expression values with overall complication grade according to the Clavien-Dindo score for postoperative complications which includes mortality.
- Association of PSP/PAP expression values with overall postoperative infectious complications and the correlation between PSP/PAP expression values and changes/alterations to management of postoperative complications.

- Value of serum PSP/PAP levels at time of admission to ICU to predict infection/sepsis outcome during postoperative course including total ICU days and total length of stay.

### **Inclusion Criteria**

- Age >18 years old
- Patients scheduled for abdominal surgery including liver, pancreas, upper gastrointestinal tract, lower gastrointestinal tract procedures, patients planned for combined kidney-renal transplantation as well as patients requiring emergency abdominal procedures
- Patients able to provide informed consent

### **Exclusion Criteria**

- Age < 18 years old
- Patients unable to provide informed consent

### **SIRS/Sepsis Criteria**

#### **SIRS**

- Fever  $\geq 38.0^{\circ}\text{C}$  or hypothermia  $\leq 36.0^{\circ}\text{C}$  measured rectal, intravascular or within the bladder
- Tachycardia  $\geq 90/\text{min}$
- Tachypnea  $\geq 20/\text{min}$  or hyperventilation (measured via arterial blood gas analysis showing a  $\text{PaCO}_2 \leq 4.3\text{kPa} / 33\text{mmHg}$ )
- Leukocytosis  $\geq 12.000/\text{mm}^3$  or leukopenia  $\leq 4.000/\text{mm}^3$  or  $\geq 10\%$  of immature neutrophils upon differential blood analysis

At least two of the above must be fulfilled to diagnose SIRS <sup>20,21</sup>

#### **Sepsis**

- Identified microbiological infection (e.g. positive blood cultures)
- At least two of the above mentioned SIRS criteria

## **DATA COLLECTION & STATISTICAL METHODOLOGY**

### **Data Collection**

Patients will be recruited on the day before surgery or upon admission for emergency abdominal surgery. They will be evaluated for inclusion criteria and informed about the study as well as the possibility of study participation. Once the informed consent form has been read, understood and signed, baseline blood samples will be obtained and sent in for routine as well as separate analysis of PSP/PAP levels. Following surgery, daily blood samples will be obtained and analyzed for the sample values. Blood samples will be marked with patient's names, date of birth and date of sample extraction for identification purposes during transportation to our laboratory. However, following arrival of the blood sample in our laboratory and prior to processing, all patient's information will be modified to allow for anonymous biobanking and study participation.

If postoperative complications occur, they will be documented in the patient's chart by the treating physicians according to the Clavien-Dindo classification of postoperative complications, as is usual clinical practice in our department. In the presence of infectious complications, evaluation for the presence of SIRS/SEPSIS according to the above-mentioned



1  
2  
3  
4  
5  
6  
7  
8  
9  
10  
11  
12  
13  
14  
15  
16  
17  
18  
19  
20  
21  
22  
23  
24  
25  
26  
27  
28  
29  
30  
31  
32  
33  
34  
35  
36  
37  
38  
39  
40  
41  
42  
43  
44  
45  
46  
47  
48  
49  
50  
51  
52  
53  
54  
55  
56  
57  
58  
59  
60

criteria will occur. If criteria for SIRS are fulfilled, blood cultures will be taken according to the above-mentioned guidelines to document septic complications. Patient demographic data will be collected via chart analysis by the principle investigator and other participating investigators and will be documented in a central, prospective database (see Supplementary File 1). Study participation ends with patient discharge (Fig. 1).

No commercial analysis kit exists for PSP/PAP analysis. Therefore the separate blood samples will be sent to our in-house research, where direct protein detection through a validated ELISA is performed<sup>22</sup>. Excessive material will be stored and catalogued in a central, anonymous bio-bank (-80°C fridge).

### Statistical Methods

We will compare continuous variables with the Student t, Mann–Whitney U, one-way ANOVA, and Kruskal-Wallis tests. Differences among proportions derived from categorical data will be assessed using the Fisher's Exact or the Pearson  $\chi^2$  tests where appropriate. Paired statistics will be used where appropriate. All p-values will be two-sided and statistical significance will be if  $p \leq 0.05$ . Sensitivity, specificity, accuracy, positive predictive value (PPV), negative predictive value (NPV), positive likelihood ratio (PLR), negative likelihood ratio (NLR), Yuden's index (YI), diagnostic odds ratio (OR), and the receiver operator characteristic (ROC) curve will be calculated. Where appropriate Kaplan-Meier survival curves and survival comparison using the log-rank test will be performed. Where appropriate, data will be presented as mean (SD), median (i.q.r.) and Odds Ratios (95% CI). We will duplicate the blood samples to analyze reproducibility of PSP/PAP measurements and assess the variability by the Pearson's Correlation Coefficient. We will use SPSS Statistics version 20 (SPSS: An IBM company, Chicago IL, 2011) to perform statistical analysis.

### STUDY SITE

Department of Surgery  
University Hospital Zurich  
Raemistrasse 100  
CH-8091 Zurich  
Switzerland

### ETHICS

This study is conducted in accordance with the principles of the Declaration of Helsinki and "good clinical practice" guidelines. The independent medical ethics committee of the canton of Zurich (Kantonale Ethikkommission Zürich, Switzerland) has approved a previous version of this study protocol. Institution Ethics Board Approval ID: KEKZH-Nr. STV 11-2009.

### DISCUSSION

To date, no perioperative studies exist looking at the value and role of PAP and PSP/reg as postoperative inflammatory serum markers in patients having major abdominal surgery, although it has been demonstrated that PSP/PAP play an important role in various inflammatory events models<sup>7,9,10,13,14</sup>. Additionally, many serum markers have been studied in the hope of discovering new biomarkers, which will aid in recognizing sepsis<sup>3-5,23</sup>. However, to date no single test exists, which enables physicians to diagnose sepsis and they therefore still have to rely on a combination of physical examination and laboratory findings as well as clinical judgment, hereby potentially delaying adequate treatment. This is crucial, as septic complications following abdominal surgery are treacherous and require early diagnosis and aggressive management due to their high rate of morbidity and mortality<sup>24,25</sup>.



Here, PSP/PAP may serve as novel markers for postoperative sepsis, to facilitate early diagnosis of sepsis and hereby hopefully directing resources to those patients at highest risk for death due to septic complications.

## CONCLUSION

The PSP-Trial is a prospective, monocentric cohort study evaluating the role of pancreas stone protein (PSP) and pancreatitis associated protein (PAP) as new markers for postoperative infectious complications following abdominal surgery.

## ABBREVIATIONS

Interleukin-1 (IL-1); interleukin-6 (IL-6); tumor necrosis factor alpha (TNF- $\alpha$ ); C-reactive protein (CRP); procalcitonin (PCT); serum amyloid A (SAA); pancreatic stone peptide (PSP); pancreatic stone protein/regenerating protein (PSP/reg); pancreatitis associated protein (PAP); secretory stress protein (SSP); positive predictive value (PPV); negative predictive value (NPV); positive likelihood ratio (PLR); negative likelihood ratio (NLR); Yuden's index (YI); diagnostic odds ratio (OR); receiver operator characteristic (ROC).

## COMPETING INTERESTS

The authors report following conflict of interests: Drs. Fisher, Oberkofler, Raptis, Soll, Béchir and Schiesser have reported that no potential conflicts of interest exist with any companies/organizations whose products or services may be discussed in this article. Prof. Graf is the inventor and the University of Zurich owns the patent for PSP/reg as a marker of sepsis.

## AUTHOR CONTRIBUTIONS

OMF and CEO drafted the manuscript and contributed equally to this work. CEO & RG designed the study protocol in its previous version. DAR performed the study design and calculation of the sample size for the study. All other authors participated in the design of the study and are local investigators. All authors were involved in editing the manuscript. All of the listed authors read and approved the final manuscript.

## FUNDING

The study is supported by the Gebert Rűf Foundation, Switzerland (GRS-014/12). No funding or assistance is received from commercial organizations.

## STUDY APPROVAL

This study is approved by the Medical Ethics Commission of the Canton of Zurich, Switzerland via a peer-reviewed process (Kantonale Ethikkommission Zurich; Institution Ethics Board Approval ID: KEKZH-Nr. STV 11-2009).

## ACKNOWLEDGEMENTS

We would like to thank Martha Bain, Udo Ungethuem, Theresia Reding Graf and Tanja Jakob for their excellent technical assistance. Additionally, we would like to thank the Gebert Rűf Foundation Switzerland, for funding our study (GRS-014/12).

## REFERENCES

1. Gressner AM TL. Proteinstoffwechsel. Lehrbuch der Klinischen Chemie und Pathobiochemie: Schattauer Stuttgart New York, 1989:152.
2. Andus T, Heinrich PC, Castell JC, et al. [Interleukin-6: a key hormone of the acute phase reaction]. Dtsch Med Wochenschr 1989;**114**(44):1710-6.
3. Staehler M, Hammer C, Meiser B, et al. Procalcitonin: a new marker for differential diagnosis of acute rejection and bacterial infection in heart transplantation. Transplantation proceedings 1997;**29**(1-2):584-5.
4. Oberhoffer M, Karzai W, Meier-Hellmann A, et al. Sensitivity and specificity of various markers of inflammation for the prediction of tumor necrosis factor-alpha and interleukin-6 in patients with sepsis. Critical care medicine 1999;**27**(9):1814-8.
5. Welsch T, Muller SA, Ulrich A, et al. C-reactive protein as early predictor for infectious postoperative complications in rectal surgery. International journal of colorectal disease 2007;**22**(12):1499-507.
6. Dimopoulou I, Armaganidis A, Douka E, et al. Tumour necrosis factor-alpha (TNFalpha) and interleukin-10 are crucial mediators in post-operative systemic inflammatory response and determine the occurrence of complications after major abdominal surgery. Cytokine 2007;**37**(1):55-61.
7. Kempainen E, Sand J, Puolakkainen P, et al. Pancreatitis associated protein as an early marker of acute pancreatitis. Gut 1996;**39**(5):675-8.
8. Iovanna J, Orelle B, Keim V, et al. Messenger RNA sequence and expression of rat pancreatitis-associated protein, a lectin-related protein overexpressed during acute experimental pancreatitis. The Journal of biological chemistry 1991;**266**(36):24664-9.

- 1  
2  
3  
4  
5  
6  
7  
8  
9  
10  
11  
12  
13  
14  
15  
16  
17  
18  
19  
20  
21  
22  
23  
24  
25  
26  
27  
28  
29  
30  
31  
32  
33  
34  
35  
36  
37  
38  
39  
40  
41  
42  
43  
44  
45  
46  
47  
48  
49  
50  
51  
52  
53  
54  
55  
56  
57  
58  
59  
60
9. Bimmler D, Schiesser M, Perren A, et al. Coordinate regulation of PSP/reg and PAP isoforms as a family of secretory stress proteins in an animal model of chronic pancreatitis. *The Journal of surgical research* 2004;**118**(2):122-35.
  10. Graf R, Schiesser M, Scheele GA, et al. A family of 16-kDa pancreatic secretory stress proteins form highly organized fibrillar structures upon tryptic activation. *The Journal of biological chemistry* 2001;**276**(24):21028-38.
  11. Iovanna JL, Keim V, Nordback I, et al. Serum levels of pancreatitis-associated protein as indicators of the course of acute pancreatitis. Multicentric Study Group on Acute Pancreatitis. *Gastroenterology* 1994;**106**(3):728-34.
  12. Masciotra L, Lechene de la Porte P, Frigerio JM, et al. Immunocytochemical localization of pancreatitis-associated protein in human small intestine. *Digestive diseases and sciences* 1995;**40**(3):519-24.
  13. Carroccio A, Iovanna JL, Iacono G, et al. Pancreatitis-associated protein in patients with celiac disease: serum levels and immunocytochemical localization in small intestine. *Digestion* 1997;**58**(2):98-103.
  14. Li L, Bachem MG, Zhou S, et al. Pancreatitis-associated protein inhibits human pancreatic stellate cell MMP-1 and -2, TIMP-1 and -2 secretion and RECK expression. *Pancreatology* 2009;**9**(1-2):99-110.
  15. Keel M, Harter L, Reding T, et al. Pancreatic stone protein is highly increased during posttraumatic sepsis and activates neutrophil granulocytes. *Critical care medicine* 2009;**37**(5):1642-8.
  16. Gukasjan R, Raptis DA, Schulz HU, et al. Pancreatic Stone Protein Predicts Outcome in Patients With Peritonitis in the ICU. *Crit Care Med* 2013.
  17. Boeck L, Graf R, Eggimann P, et al. Pancreatic stone protein: a marker of organ failure and outcome in ventilator-associated pneumonia. *Chest* 2011;**140**(4):925-32.

- 1  
2  
3  
4  
5  
6  
7  
8  
9  
10  
11  
12  
13  
14  
15  
16  
17  
18  
19  
20  
21  
22  
23  
24  
25  
26  
27  
28  
29  
30  
31  
32  
33  
34  
35  
36  
37  
38  
39  
40  
41  
42  
43  
44  
45  
46  
47  
48  
49  
50  
51  
52  
53  
54  
55  
56  
57  
58  
59  
60
18. Que YA, Delodder F, Guessous I, et al. Pancreatic stone protein as an early biomarker predicting mortality in a prospective cohort of patients with sepsis requiring ICU management. *Crit Care* 2012;**16**(4):R114.
  19. Dindo D, Demartines N, Clavien PA. Classification of surgical complications: a new proposal with evaluation in a cohort of 6336 patients and results of a survey. *Annals of surgery* 2004;**240**(2):205-13.
  20. Gesellschaft DS. Leitlinien Sepsis. Secondary Leitlinien Sepsis 2010. <http://www.sepsis-gesellschaft.de/cgi-bin/WebObjects/DsgCMS.woa/2/wo/2ewkjkZfYnXP78ZyUCxIGM/2.1.MainWrapper.25.1.1.0.3.1.1.3.7.0.0>.
  21. American College of Chest Physicians/Society of Critical Care Medicine Consensus Conference: definitions for sepsis and organ failure and guidelines for the use of innovative therapies in sepsis. *Critical care medicine* 1992;**20**(6):864-74.
  22. Scherr A, Graf R, Bain M, et al. Pancreatic stone protein predicts positive sputum bacteriology in exacerbations of COPD. *Chest* 2012.
  23. Sankar V, Webster NR. Clinical application of sepsis biomarkers. *Journal of anesthesia* 2012.
  24. Moore LJ, Moore FA, Todd SR, et al. Sepsis in general surgery: the 2005-2007 national surgical quality improvement program perspective. *Arch Surg* 2010;**145**(7):695-700.
  25. Moore LJ, Moore FA, Jones SL, et al. Sepsis in general surgery: a deadly complication. *American journal of surgery* 2009;**198**(6):868-74.

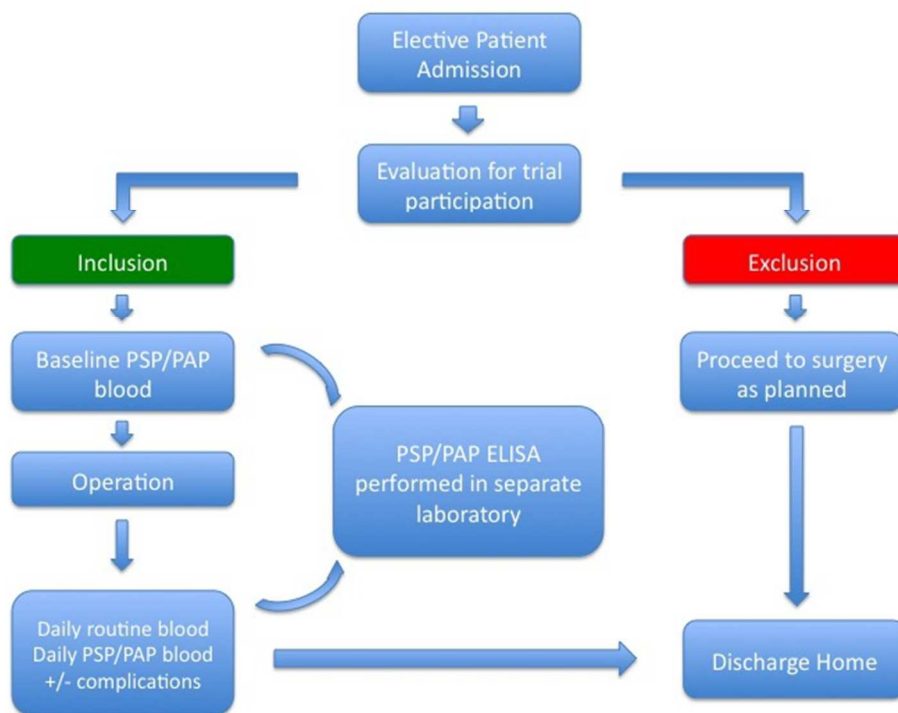

Figure 1. Flow chart of patient recruitment and study participation.  
254x190mm (72 x 72 DPI)

ew only

1  
2  
3  
4  
5  
6  
7  
8  
9  
10  
11  
12  
13  
14  
15  
16  
17  
18  
19  
20  
21  
22  
23  
24  
25  
26  
27  
28  
29  
30  
31  
32  
33  
34  
35  
36  
37  
38  
39  
40  
41  
42  
43  
44  
45  
46  
47  
48  
49  
50  
51  
52  
53  
54  
55  
56  
57  
58  
59  
60

# Patient Case Report Form - PSP Trial

## Patient Baseline Data

Patient Study Number

Birth date (dd/mm/yyyy)

Gender

Male  Female

Ethnicity

Caucasian

Asian

African

Other/mix \_\_\_\_\_

Height (m)

Weight (kg)

BMI (body-mass-index kg/m<sup>2</sup>)

Underlying Disease / Reason for Admission

Malignant

Yes

No

Admission Date (dd/mm/yyyy)

# Patient Case Report Form - PSP Trial

## Operation Data

Operation Date (dd/mm/yyyy)

Operation Type

- General Surgery
- Emergency Abdominal Surgery
- (Major) Endocrine Surgery
- Upper-Gastrointestinal Surgery
- Lower-Gastrointestinal Surgery
- Hepato-Pancreato-Biliary Surgery
- Transplantation
- Undefined

Operation (Text description)



# Patient Case Report Form - PSP Trial

**Hospitalisation and Follow-Up Data**

Immediate Postoperative Intensive Care Unit  Yes  No

ICU Length of Stay (immediate postop) \_\_\_\_\_

Complications  Yes  No

Complication Date (dd/mm/yyyy)  
(= postoperative Day X)

Complication Grade (according to Clavien-Dindo Score)

- No complications
- Grade I
- Grade II (medications only)
- Grade IIIa (intervention under local anesthetic)
- Grade IIIb (intervention under general anesthesia)
- Grade IVa (organ failure, admission to ICU)
- Grade IVb (multi-organ failure, admission to ICU)
- Grade V (Death)

Type of Complication (text)

1  
2  
3  
4  
5  
6  
7  
8  
9  
10  
11  
12  
13  
14  
15  
16  
17  
18  
19  
20  
21  
22  
23  
24  
25  
26  
27  
28  
29  
30  
31  
32  
33  
34  
35  
36  
37  
38  
39  
40  
41  
42  
43  
44  
45  
46  
47

|    |                                       |                                       |                          |
|----|---------------------------------------|---------------------------------------|--------------------------|
| 1  |                                       |                                       |                          |
| 2  |                                       |                                       |                          |
| 3  |                                       |                                       |                          |
| 4  |                                       |                                       |                          |
| 5  | <b>Postoperative SIRS</b>             | Yes                                   | <input type="checkbox"/> |
| 6  |                                       | No                                    | <input type="checkbox"/> |
| 7  |                                       |                                       |                          |
| 8  | <b>Postoperative Sepsis</b>           | Yes                                   | <input type="checkbox"/> |
| 9  |                                       | No                                    | <input type="checkbox"/> |
| 10 |                                       |                                       |                          |
| 11 |                                       |                                       |                          |
| 12 | <b>Blood Cultures Positive</b>        | Yes                                   | <input type="checkbox"/> |
| 13 |                                       | No                                    | <input type="checkbox"/> |
| 14 |                                       |                                       |                          |
| 15 |                                       |                                       |                          |
| 16 | <b>Type of Microbiota</b>             | Gram positive                         | <input type="checkbox"/> |
| 17 |                                       | Gram negative                         | <input type="checkbox"/> |
| 18 |                                       | Fungi                                 | <input type="checkbox"/> |
| 19 |                                       | Viral                                 | <input type="checkbox"/> |
| 20 |                                       | Please specify microbiota type: _____ | <input type="checkbox"/> |
| 21 |                                       |                                       |                          |
| 22 |                                       |                                       |                          |
| 23 |                                       |                                       |                          |
| 24 | <b>Preoperative Antibiotics (AB)?</b> | Yes                                   | <input type="checkbox"/> |
| 25 |                                       | No                                    | <input type="checkbox"/> |
| 26 |                                       |                                       |                          |
| 27 |                                       |                                       |                          |
| 28 | <b>Preoperative AB-Type</b>           | Co-Amoxicillin (or similar)           | <input type="checkbox"/> |
| 29 | (multiple choices possible)           | Cephalosporin                         | <input type="checkbox"/> |
| 30 |                                       | Chinolone (Ciproxin and similar)      | <input type="checkbox"/> |
| 31 |                                       | Metronidazole                         | <input type="checkbox"/> |
| 32 |                                       | Piperacillin/Tazobactam               | <input type="checkbox"/> |
| 33 |                                       | Carbapenem                            | <input type="checkbox"/> |
| 34 |                                       | Vancomycin/Daptomycin                 | <input type="checkbox"/> |
| 35 |                                       | Other, please indicate: _____         | <input type="checkbox"/> |
| 36 |                                       |                                       |                          |
| 37 |                                       |                                       |                          |
| 38 |                                       |                                       |                          |
| 39 |                                       |                                       |                          |
| 40 |                                       |                                       |                          |
| 41 |                                       |                                       |                          |
| 42 |                                       |                                       |                          |
| 43 |                                       |                                       |                          |
| 44 |                                       |                                       |                          |
| 45 |                                       |                                       |                          |
| 46 |                                       |                                       |                          |
| 47 |                                       |                                       |                          |

|    |                                                 |                                    |                          |
|----|-------------------------------------------------|------------------------------------|--------------------------|
| 1  |                                                 |                                    |                          |
| 2  |                                                 |                                    |                          |
| 3  | <b>Postoperative AB-Prophylaxis?</b>            | Yes                                | <input type="checkbox"/> |
| 4  |                                                 | No                                 | <input type="checkbox"/> |
| 5  |                                                 |                                    |                          |
| 6  |                                                 |                                    |                          |
| 7  | <b>Postoperative Prophylaxis AB-Type</b>        | Co-Amoxicillin (or similar)        | <input type="checkbox"/> |
| 8  | (multiple choices possible)                     | Cephalosporin                      | <input type="checkbox"/> |
| 9  |                                                 | Chinolone (Ciproxin and similar)   | <input type="checkbox"/> |
| 10 |                                                 | Metronidazole                      | <input type="checkbox"/> |
| 11 |                                                 | Piperacillin/Tazobactam            | <input type="checkbox"/> |
| 12 |                                                 | Carbapenem                         | <input type="checkbox"/> |
| 13 |                                                 | Vancomycin/Daptomycin              | <input type="checkbox"/> |
| 14 |                                                 | Other, please indicate: _____      | <input type="checkbox"/> |
| 15 |                                                 |                                    |                          |
| 16 |                                                 |                                    |                          |
| 17 |                                                 |                                    |                          |
| 18 |                                                 |                                    |                          |
| 19 | <b>Postoperative AB-Therapy?</b>                | Yes                                | <input type="checkbox"/> |
| 20 |                                                 | No                                 | <input type="checkbox"/> |
| 21 |                                                 |                                    |                          |
| 22 |                                                 |                                    |                          |
| 23 | <b>Indication for Start of Postoperative AB</b> | Fever                              | <input type="checkbox"/> |
| 24 |                                                 | Increasing inflammatory parameters | <input type="checkbox"/> |
| 25 |                                                 | SIRS (empirical)                   | <input type="checkbox"/> |
| 26 |                                                 | Sepsis (empirical)                 | <input type="checkbox"/> |
| 27 |                                                 | Sepsis (directed therapy)          | <input type="checkbox"/> |
| 28 |                                                 | Other, please indicate: _____      | <input type="checkbox"/> |
| 29 |                                                 |                                    |                          |
| 30 |                                                 |                                    |                          |
| 31 |                                                 |                                    |                          |
| 32 | <b>Date Start of Postoperative AB-Therapy?</b>  |                                    |                          |
| 33 | (= postoperative Day X); (dd/mm/yyyy)           |                                    |                          |
| 34 |                                                 |                                    |                          |
| 35 |                                                 |                                    |                          |
| 36 | <b>Postoperative AB-Therapy Type</b>            | Co-Amoxicillin (or similar)        | <input type="checkbox"/> |
| 37 | (multiple choices possible)                     | Cephalosporin                      | <input type="checkbox"/> |
| 38 |                                                 | Chinolone (Ciproxin and similar)   | <input type="checkbox"/> |
| 39 |                                                 | Metronidazole                      | <input type="checkbox"/> |
| 40 |                                                 |                                    |                          |
| 41 |                                                 |                                    |                          |
| 42 |                                                 |                                    |                          |
| 43 |                                                 |                                    |                          |
| 44 |                                                 |                                    |                          |
| 45 |                                                 |                                    |                          |
| 46 |                                                 |                                    |                          |
| 47 |                                                 |                                    |                          |

|                                                                                         |                                         |                          |
|-----------------------------------------------------------------------------------------|-----------------------------------------|--------------------------|
|                                                                                         | Piperacillin/Tazobactam                 | <input type="checkbox"/> |
|                                                                                         | Carbapenem                              | <input type="checkbox"/> |
|                                                                                         | Vancomycin/Daptomycin                   | <input type="checkbox"/> |
|                                                                                         | Other, please indicate: _____           | <input type="checkbox"/> |
| <b>AB Change / Escalation</b>                                                           | Yes                                     | <input type="checkbox"/> |
|                                                                                         | No                                      | <input type="checkbox"/> |
| <b>Date AB Change / Escalation</b><br>(= postoperative Day X); (dd/mm/yyyy)             |                                         |                          |
| <b>Indication for AB Change/Escalation</b>                                              | Fever                                   | <input type="checkbox"/> |
|                                                                                         | Increasing inflammatory parameters      | <input type="checkbox"/> |
|                                                                                         | SIRS (empirical)                        | <input type="checkbox"/> |
|                                                                                         | Sepsis (empirical)                      | <input type="checkbox"/> |
|                                                                                         | Sepsis (directed therapy)               | <input type="checkbox"/> |
|                                                                                         | Microbiology Report with AB-Resistogram | <input type="checkbox"/> |
|                                                                                         | Other, please indicate: _____           | <input type="checkbox"/> |
| <b>Date AB STOP (regardless of indication)</b><br>(= postoperative Day X); (dd/mm/yyyy) |                                         |                          |
| <b>Antifungal Therapy</b>                                                               | Yes                                     | <input type="checkbox"/> |
|                                                                                         | No                                      | <input type="checkbox"/> |
| <b>Preoperative Antifungal Therapy</b>                                                  | Yes                                     | <input type="checkbox"/> |
|                                                                                         | No                                      | <input type="checkbox"/> |

|    |                                                  |                               |                          |
|----|--------------------------------------------------|-------------------------------|--------------------------|
| 1  |                                                  |                               |                          |
| 2  |                                                  |                               |                          |
| 3  | <b>Preoperative Antifungal Therapy Type</b>      | Fluconazole                   | <input type="checkbox"/> |
| 4  |                                                  | Itraconazole                  | <input type="checkbox"/> |
| 5  |                                                  | Voriconazole                  | <input type="checkbox"/> |
| 6  |                                                  | Caspofungin                   | <input type="checkbox"/> |
| 7  |                                                  | Ampho B                       | <input type="checkbox"/> |
| 8  |                                                  | Other, please indicate: _____ | <input type="checkbox"/> |
| 9  |                                                  |                               |                          |
| 10 |                                                  |                               |                          |
| 11 |                                                  |                               |                          |
| 12 | <b>Postoperative Antifungal Prophylaxis</b>      | Yes                           | <input type="checkbox"/> |
| 13 |                                                  | No                            | <input type="checkbox"/> |
| 14 |                                                  |                               |                          |
| 15 |                                                  |                               |                          |
| 16 | <b>Postoperative Antifungal Prophylaxis Type</b> | Fluconazole                   | <input type="checkbox"/> |
| 17 |                                                  | Itraconazole                  | <input type="checkbox"/> |
| 18 |                                                  | Voriconazole                  | <input type="checkbox"/> |
| 19 |                                                  | Caspofungin                   | <input type="checkbox"/> |
| 20 |                                                  | Ampho B                       | <input type="checkbox"/> |
| 21 |                                                  | Other, please indicate: _____ | <input type="checkbox"/> |
| 22 |                                                  |                               |                          |
| 23 |                                                  |                               |                          |
| 24 |                                                  |                               |                          |
| 25 | <b>Postoperative Antifungal Therapy</b>          | Yes                           | <input type="checkbox"/> |
| 26 |                                                  | No                            | <input type="checkbox"/> |
| 27 |                                                  |                               |                          |
| 28 |                                                  |                               |                          |
| 29 | <b>Postoperative Antifungal Therapy Type</b>     | Fluconazole                   | <input type="checkbox"/> |
| 30 |                                                  | Itraconazole                  | <input type="checkbox"/> |
| 31 |                                                  | Voriconazole                  | <input type="checkbox"/> |
| 32 |                                                  | Caspofungin                   | <input type="checkbox"/> |
| 33 |                                                  | Ampho B                       | <input type="checkbox"/> |
| 34 |                                                  | Other, please indicate: _____ | <input type="checkbox"/> |
| 35 |                                                  |                               |                          |
| 36 |                                                  |                               |                          |
| 37 |                                                  |                               |                          |
| 38 | <b>Postoperative Antifungal</b>                  | Yes                           | <input type="checkbox"/> |
| 39 | <b>Change/Escalation</b>                         | No                            | <input type="checkbox"/> |
| 40 |                                                  |                               |                          |
| 41 |                                                  |                               |                          |
| 42 |                                                  |                               |                          |
| 43 |                                                  |                               |                          |
| 44 |                                                  |                               |                          |
| 45 |                                                  |                               |                          |
| 46 |                                                  |                               |                          |
| 47 |                                                  |                               |                          |

1  
2  
3  
4  
5  
6  
7  
8  
9  
10  
11  
12  
13  
14  
15  
16  
17  
18  
19  
20  
21  
22  
23  
24  
25  
26  
27  
28  
29  
30  
31  
32  
33  
34  
35  
36  
37  
38  
39  
40  
41  
42  
43  
44  
45  
46  
47

|                                                                    |                                         |                          |
|--------------------------------------------------------------------|-----------------------------------------|--------------------------|
| <b>Indication for Antifungal Change/Escalation</b>                 | Fever                                   | <input type="checkbox"/> |
|                                                                    | Increasing inflammatory parameters      | <input type="checkbox"/> |
|                                                                    | SIRS (empirical)                        | <input type="checkbox"/> |
|                                                                    | Sepsis (empirical)                      | <input type="checkbox"/> |
|                                                                    | Sepsis (directed therapy)               | <input type="checkbox"/> |
|                                                                    | Microbiology Report with AB-Resistogram | <input type="checkbox"/> |
|                                                                    | Other, please indicate: _____           | <input type="checkbox"/> |
| <b>Date Antifungal Therapy Change/Escalation (dd/mm/yyyy)</b>      |                                         |                          |
| <b>Date Antifungals STOP (= postoperative Day X); (dd/mm/yyyy)</b> |                                         |                          |
| <b>Re-Operation?</b>                                               | Yes                                     | <input type="checkbox"/> |
|                                                                    | No                                      | <input type="checkbox"/> |
| <b>Re-Operation Date (dd/mm/yyyy) (= postoperative Day X)</b>      |                                         |                          |
| <b>Re-Operation Type (text)</b>                                    |                                         |                          |
| <b>Re-Operation times</b>                                          | 1                                       | <input type="checkbox"/> |
|                                                                    | 2                                       | <input type="checkbox"/> |
|                                                                    | 3                                       | <input type="checkbox"/> |
|                                                                    | 4                                       | <input type="checkbox"/> |
|                                                                    | 5                                       | <input type="checkbox"/> |
|                                                                    | >5                                      | <input type="checkbox"/> |

1  
2  
3  
4  
5  
6  
7  
8  
9  
10  
11  
12  
13  
14  
15  
16  
17  
18  
19  
20  
21  
22  
23  
24  
25  
26  
27  
28  
29  
30  
31  
32  
33  
34  
35  
36  
37  
38  
39  
40  
41  
42  
43  
44  
45  
46  
47

|                                                                                   |                               |                          |
|-----------------------------------------------------------------------------------|-------------------------------|--------------------------|
| <b>Pre-Reoperation Diagnostics?</b>                                               | Yes                           | <input type="checkbox"/> |
|                                                                                   | No                            | <input type="checkbox"/> |
| <b>Pre-Reoperation Diagnostisc Type</b>                                           | Conventional X-ray            |                          |
|                                                                                   | CT-Scan                       |                          |
|                                                                                   | Other, please indicate: _____ |                          |
| <b>Postoperative Intervention (e.g. drain-placement through radiologist etc.)</b> | Yes                           | <input type="checkbox"/> |
|                                                                                   | No                            | <input type="checkbox"/> |
| <b>Postoperative Intervention Date (= postoperative Day X); (dd/mm/yyyy)</b>      |                               |                          |
| <b>Postoperative Intervention Type (text)</b>                                     |                               |                          |
| <b>Postoperative Intervention Times</b>                                           | 1                             | <input type="checkbox"/> |
|                                                                                   | 2                             | <input type="checkbox"/> |
|                                                                                   | 3                             | <input type="checkbox"/> |
|                                                                                   | 4                             | <input type="checkbox"/> |
|                                                                                   | 5                             | <input type="checkbox"/> |
|                                                                                   | >5                            | <input type="checkbox"/> |
| <b>ICU-Readmission</b>                                                            | Yes                           | <input type="checkbox"/> |
|                                                                                   | No                            | <input type="checkbox"/> |
| <b>ICU-Readmission Date (dd/mm/yyyy)</b>                                          |                               |                          |

For peer review only



1  
2  
3  
4  
5  
6  
7  
8  
9  
10  
11  
12  
13  
14  
15  
16  
17  
18  
19  
20  
21  
22  
23  
24  
25  
26  
27  
28  
29  
30  
31  
32  
33  
34  
35  
36  
37  
38  
39  
40  
41  
42  
43  
44  
45  
46  
47

ICU-Readmission LOS \_\_\_\_\_

Hospital Discharge

Yes

No

If no, please indicate if

a) in hospital death

b) other reason

Hospital Discharge Date (dd/mm/yyyy)

Hospital Total Length of Stay (LOS) \_\_\_\_\_

For peer review only

## Patient Case Report Form - PSP Trial

### Laboratory Values

|                                     |                           |                          |
|-------------------------------------|---------------------------|--------------------------|
| <b>White Blood Cell Count (WBC)</b> | WBO 0 (Baseline)          | <input type="checkbox"/> |
|                                     | WBC 1 (Day 1)             | <input type="checkbox"/> |
|                                     | WBC 2                     | <input type="checkbox"/> |
|                                     | .....                     |                          |
|                                     | WBC XY (Day of discharge) | <input type="checkbox"/> |
| <b>C-Reactive Protein</b>           | CRP 0 (Baseline)          | <input type="checkbox"/> |
|                                     | CRP 1                     | <input type="checkbox"/> |
|                                     | CRP 2                     | <input type="checkbox"/> |
|                                     | ....                      |                          |
|                                     | CRP XY                    | <input type="checkbox"/> |
| <b>Procalcitonin</b>                | PCT 0                     | <input type="checkbox"/> |
|                                     | PCT 1                     | <input type="checkbox"/> |
|                                     | PCT 2                     | <input type="checkbox"/> |
|                                     | ...                       |                          |
|                                     | PCT XY                    | <input type="checkbox"/> |
| <b>Thrombocytes</b>                 | TC 0                      | <input type="checkbox"/> |
|                                     | TC 1                      | <input type="checkbox"/> |
|                                     | TC 2                      | <input type="checkbox"/> |
|                                     | ...                       |                          |
|                                     | TC XY                     | <input type="checkbox"/> |

**Pancreatic Stone Protein**

PSP 0

PSP 1

PSP 2

...

PSP XY

**Pancreatitis-associated Protein**

PAP 0

PAP 1

PAP 2

...

PAP XY

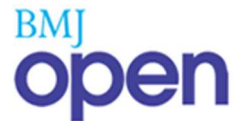

**Pancreatic Stone Protein and Pancreatitis-associated Protein: Diagnostic Efficacy and Prognostic Value of PSP and PAP as Postoperative Markers of Septic Complications in Patients Undergoing Abdominal Surgery (PSP-Study)**

|                                 |                                                                                                                                                                                                                                                                                                                                                                                                                                                                                                                    |
|---------------------------------|--------------------------------------------------------------------------------------------------------------------------------------------------------------------------------------------------------------------------------------------------------------------------------------------------------------------------------------------------------------------------------------------------------------------------------------------------------------------------------------------------------------------|
| Journal:                        | <i>BMJ Open</i>                                                                                                                                                                                                                                                                                                                                                                                                                                                                                                    |
| Manuscript ID:                  | bmjopen-2014-004914.R1                                                                                                                                                                                                                                                                                                                                                                                                                                                                                             |
| Article Type:                   | Protocol                                                                                                                                                                                                                                                                                                                                                                                                                                                                                                           |
| Date Submitted by the Author:   | 03-Feb-2014                                                                                                                                                                                                                                                                                                                                                                                                                                                                                                        |
| Complete List of Authors:       | Fisher, Oliver; University Hospital Zurich, Department of Surgery<br>Oberkofler, Christian; University Hospital Zurich, Department of Surgery<br>Raptis, Dimitri; University Hospital Zurich, Department of Surgery<br>Soll, Christopher; Cantonal Hospital Winterthur, Department of Surgery<br>Bécher, Markus; University Hospital Zurich, Surgical Intensive Care Unit<br>Schiesser, Marc; Cantonal Hospital St. Gallen, Department of Surgery<br>Graf, Rolf; University Hospital Zurich, Department of Surgery |
| <b>Primary Subject Heading</b>: | Surgery                                                                                                                                                                                                                                                                                                                                                                                                                                                                                                            |
| Secondary Subject Heading:      | Surgery, Infectious diseases, Intensive care                                                                                                                                                                                                                                                                                                                                                                                                                                                                       |
| Keywords:                       | Adult surgery < SURGERY, Gastrointestinal infections < GASTROENTEROLOGY, Infection control < INFECTIOUS DISEASES, Colorectal surgery < SURGERY, Hepatobiliary surgery < SURGERY, Transplant surgery < SURGERY                                                                                                                                                                                                                                                                                                      |
|                                 |                                                                                                                                                                                                                                                                                                                                                                                                                                                                                                                    |

SCHOLARONE™  
Manuscripts

1  
2  
3  
4  
5  
6  
7  
8  
9  
10  
11  
12

**Pancreatic Stone Protein and Pancreatitis-associated Protein:  
Diagnostic Efficacy and Prognostic Value of PSP and PAP as  
Postoperative Markers of Septic Complications in Patients  
Undergoing Abdominal Surgery  
(PSP-Study)**

13  
14 Oliver Maximilian Fisher, MD<sup>1†</sup>, Christian Eugen Oberkofler, MD<sup>1†</sup>, Dimitri Aristotle Raptis,  
15 MD<sup>1</sup>, Christopher Soll, MD<sup>2</sup>, Markus Béchir, MD<sup>3</sup>, Marc Schiesser, MD, MS<sup>4</sup>, Rolf Graf,  
16 PhD<sup>1\*</sup>

17  
18 \* Corresponding Author

19 Prof. Rolf Graf, PhD

20 Department of Surgery

21 Pancreatitis Laboratory DL 34

22 University Hospital Zurich

23 Sternwartstrasse 14

24 CH-8091 Switzerland

25 Phone: +41 44 255 20 71

26 Fax: +41 44 255 50 47

27 Email: rolf.graf@usz.ch  
28  
29  
30

31  
32 <sup>1</sup> Department of Surgery, University Hospital Zurich, Raemistrasse 100, Zurich  
33 CH-8091, Switzerland

34  
35 <sup>2</sup> Department of Surgery, Cantonal Hospital Winterthur, Brauerstrasse 15, Winterthur CH-  
36 8401, Switzerland

37  
38 <sup>3</sup> Surgical Intensive Care Unit, University Hospital Zurich, Raemistrasse 100, Zurich CH-  
39 8091, Switzerland

40  
41 <sup>4</sup> Department of Surgery, Cantonal Hospital St. Gallen, Rorschacherstrasse 95, St. Gallen CH-  
42 9007, Switzerland  
43  
44

45 <sup>†</sup> **Equal contributors**

46  
47 **Keywords:** pancreatic stone protein, pancreatitis associated protein, secretory stress protein,  
48 abdominal surgery, sepsis

49 **Word count: 2065**  
50  
51  
52  
53  
54  
55  
56  
57  
58  
59  
60

**PSP-Study**

Department of Surgery  
University Hospital Zurich  
January 2014

**STRENGTHS:**

- Assessment of the novel sepsis biomarkers PSP/PAP in an abdominal surgical study population
- Comparison of PSP/PAP to other acute-phase reaction proteins, regularly measured in surgical study populations
- Evaluation of ability of PSP/PAP to predict infectious complications in patients undergoing major abdominal surgery
- Evaluation of ability of PSP/PAP to predict postoperative sepsis in patients undergoing major abdominal surgery (independently and in comparison to other inflammatory markers)
- External validation of PSP/PAP as a sepsis marker in an independent, prospective patient cohort

**LIMITATIONS:**

- Limited ability to generalize to other surgical or medical patient populations
- Limited ability to determine role in guiding treatment decisions
- **Non-blinded, non-randomized single-center observational cohort study**

## PSP-Study

Department of Surgery  
University Hospital Zurich  
January 2014

1  
2  
3  
4  
5  
6 Introduction. Major abdominal surgery leads to a postoperative systemic inflammatory  
7 response, making it difficult to discriminate patients with SIRS from those with a  
8 beginning postoperative infectious complication. To date, physicians still have to rely on  
9 their clinical experience to differ between the two. Pancreatic stone protein (PSP) and  
10 pancreatitis-associated protein (PAP), both secretory proteins produced by the pancreas,  
11 are dramatically increased during pancreatic disease and have been shown to act as acute-  
12 phase proteins. Increased levels of PSP have been detected in polytrauma patients  
13 developing sepsis and PSP has shown a high diagnostic accuracy in discriminating the  
14 severity of peritonitis and in predicting death in ICU patients. However, the prognostic  
15 value of PSP/PAP for infectious complications among patients undergoing major  
16 abdominal surgery is unknown.  
17  
18

19  
20 Methods & Analysis. 160 patients undergoing major abdominal surgery will be recruited  
21 preoperatively. On the day before surgery, baseline blood values are attained. Following  
22 surgery, daily blood samples for measuring regular inflammation markers (C-reactive  
23 protein, procalcitonin, interleukin-6, TNF-alpha, leucocyte counts) and PSP/PAP will be  
24 acquired. PSP/PAP will be measured using a validated ELISA developed in our research  
25 laboratory. Patient discharge marks the end of trial participation. Complication grade  
26 including mortality and occurrence of infectious postoperative complications according to  
27 validated diagnostic criteria will be correlated with PSP/PAP values. Total intensive care  
28 unit day and total length of stay will be recorded as further outcome parameters.  
29  
30

31 Objectives. The PSP-Study is a prospective monocentric cohort study evaluating the  
32 prognostic value of pancreatic stone protein (PSP) and pancreatitis associated protein  
33 (PAP) for postoperative infectious complications. Additionally, a comparison with  
34 established inflammation markers in patients undergoing major abdominal surgery will be  
35 performed to help evaluate the role of these proteins in predicting and diagnosing  
36 infectious and other postoperative complications.  
37  
38

39 Ethics. Institution Ethics Board Approval ID: KEKZH-Nr. STV 11-2009

40 Trial Registration. ClinicalTrials.gov: NCT01258179  
41  
42  
43  
44  
45  
46  
47  
48  
49  
50  
51  
52  
53  
54  
55  
56  
57  
58  
59  
60



## PSP-Study

Department of Surgery  
University Hospital Zurich  
January 2014

**BACKGROUND & CURRENT KNOWLEDGE**

The acute-phase reaction is a systemic, non-specific response of the organism to acute inflammation, infection, and also occurs after surgery and the acute-phase reaction is associated with changes in the plasma protein profile<sup>1</sup>. Endothelial cells, fibroblasts and inflammatory cells such as macrophages secrete endogenous immune mediators in the damaged tissue, such as Interleukin-1 (IL-1), interleukin-6 (IL-6), interferon- $\gamma$  and tumor necrosis factor alpha (TNF- $\alpha$ ). In the presence of cortisol this results in the induction of synthesis of various acute-phase proteins stemming from the liver<sup>2</sup>. These include C-reactive protein (CRP), serum amyloid A (SAA), fibrinogen and the complement C3<sup>3</sup>. These proteins can be used as outcome measures of the acute-phase reaction<sup>3</sup> and have been established in clinical practice. Prolonged increase of acute-phase proteins has been shown to be predictive for postoperative infections and septic complications<sup>4,5</sup>. Additionally, studies have shown, that inflammatory markers such as TNF, IL-10 and IL-6 play an important role in the pathogenesis of postoperative SIRS<sup>6</sup>. But acute-phase proteins aren't only synthesized in the liver. It has been shown that the pancreas increases production of pancreatic secretory proteins such as pancreatitis associated protein (PAP) and the pancreatic stone protein/regenerating protein (PSP/reg), known as secretory stress proteins (SSP)<sup>7,8</sup>. In previous work, our group has shown an increased production and secretion of SSPs in stress induction of a murine pancreatitis-model (WBN / Kob rat)<sup>9,10</sup>. Another group was able to demonstrate a correlation between the course of pancreatitis and the induction of pancreatic secretory stress proteins<sup>11</sup>. However, it has also been demonstrated that both PAP and PSP are secreted in other organs, such as the small intestine<sup>12,13</sup>. PAP was increased under inflammatory conditions of the small intestine, especially in celiac disease<sup>13</sup>. More recently, it was demonstrated that PAP is involved in wound healing processes and it's associated metalloproteinases<sup>14</sup>.

In a clinical study in polytrauma patients a significant increase of PSP was observed in those patients who developed infections or sepsis<sup>15</sup>. The same study showed that PSP binds and activates neutrophils, thus acting as an acute-phase protein. The concept that PSP is an early marker of sepsis was further confirmed in subsequent studies on patient populations admitted to the ICU<sup>16-18</sup>.

Therefore it seems clear, that PAP and PSP play an important role in various inflammatory events, not only in pancreatitis but also in sepsis subsequent to other inflammatory diseases. However to date, no perioperative study exist, which looks at the value of these proteins and their role as postoperative inflammatory serum markers following major abdominal surgery. Additionally, differentiating between a simple inflammatory response and a true infectious complication following abdominal surgery still remains a challenge in clinical practice. Here, PAP and PSP/reg may provide valuable information and aid in differentiating between both events in the postoperative setting.

## METHODS & STUDY DESIGN

The PSP-Study is a prospective, monocentric cohort study evaluating the role of Pancreatic Stone Protein (PSP) and Pancreatitis Associated Protein (PAP) as new markers for postoperative infectious complications following abdominal surgery. Our study population will consist of patients undergoing liver (n = 30), pancreas (n = 30), upper gastrointestinal tract (n=30) and lower gastrointestinal tract (n=30) surgery as well as patients undergoing emergency abdominal procedures (n=20) and patients undergoing combined renal/pancreas-transplantation (n=10). Hence, a total of 160 patients will be recruited. To ensure adequate data quality, an interim analysis will be performed once 80 patients have been recruited. A power analysis will be performed based on the actual and precise data collected. At interim analysis the potential need to modify the sample size will be investigated. If the external data monitoring committee suggests any changes based on these calculations, the principal investigators will decide on the feasibility of the potential changes and submit a formal addendum to the ethics committee. Unless first approved by the local ethics committee, no changes will be made to the protocol or study design. Any changes to the protocol approved by the ethics committee will be updated at [clinicaltrials.gov](http://clinicaltrials.gov) [NCT01258179].

## STUDY OBJECTIVES & ENDPOINTS

### Study objectives

1. To determine serum levels of PAP and PSP/reg attained from venous samples of patients undergoing major abdominal surgery.
2. To determine an association between PSP/PAP expression and current, routinely measured inflammatory markers (C-reactive protein, procalcitonin, TNF-alpha, IL-6, white blood cell count, thrombocyte count) and compare these with regards to predicting postoperative complications?
3. To determine, whether PSP/PAP levels correlate with postoperative infectious complications and general postoperative complications as graded by the validated Clavien-Dindo classification for postoperative surgical complications<sup>19</sup>?
4. To determine if PSP/PAP can be used as a predictive marker for postoperative infectious complications and sepsis?

### Endpoints

#### Primary Endpoint

- Association of PSP/PAP expression values with patients experiencing infectious postoperative complication according to the Systemic Inflammatory Response Syndrome (SIRS) and Sepsis Criteria of the German Interdisciplinary Association of Intensive and Emergency Medicine (DIVI) and the ACCP/SCCM Consensus Conference Criteria<sup>20,21</sup>.

#### Secondary Endpoints

- Correlation/comparison of PSP/PAP expression values to current markers of inflammation in patients undergoing major abdominal surgery.
- Association of PSP/PAP expression values with overall complication grade according to the Clavien-Dindo score for postoperative complications which includes mortality.
- Association of PSP/PAP expression values with overall postoperative infectious complications and the correlation between PSP/PAP expression values and changes/alterations to management of postoperative complications.

- Value of serum PSP/PAP levels at time of admission to ICU to predict infection/sepsis outcome during postoperative course including total ICU days and total length of stay.

### **Inclusion Criteria**

- Age >18 years old
- Patients scheduled for abdominal surgery including liver, pancreas, upper gastrointestinal tract, lower gastrointestinal tract procedures, patients planned for combined kidney-renal transplantation as well as patients requiring emergency abdominal procedures
- Patients able to provide informed consent

### **Exclusion Criteria**

- Age < 18 years old
- Patients unable to provide informed consent

### **SIRS/Sepsis Criteria**

#### **SIRS**

- Fever  $\geq 38.0^{\circ}\text{C}$  or hypothermia  $\leq 36.0^{\circ}\text{C}$  measured rectal, intravascular or within the bladder
- Tachycardia  $\geq 90/\text{min}$
- Tachypnea  $\geq 20/\text{min}$  or hyperventilation (measured via arterial blood gas analysis showing a  $\text{PaCO}_2 \leq 4.3\text{kPa} / 33\text{mmHg}$ )
- Leukocytosis  $\geq 12.000/\text{mm}^3$  or leukopenia  $\leq 4.000/\text{mm}^3$  or  $\geq 10\%$  of immature neutrophils upon differential blood analysis

At least two of the above must be fulfilled to diagnose SIRS <sup>20,21</sup>

#### **Sepsis**

- Identified microbiological infection (e.g. positive blood cultures)
- At least two of the above mentioned SIRS criteria

## **DATA COLLECTION & STATISTICAL METHODOLOGY**

### **Data Collection**

Patients will be recruited on the day before surgery or upon admission for emergency abdominal surgery. They will be evaluated for inclusion criteria and informed about the study as well as the possibility of study participation. Once the informed consent form has been read, understood and signed, baseline blood samples will be obtained and sent in for routine as well as separate analysis of PSP/PAP levels. Following surgery, daily blood samples will be obtained and analyzed for the sample values. Blood samples will be marked with patient's names, date of birth and date of sample extraction for identification purposes during transportation to our laboratory. However, following arrival of the blood sample in our laboratory and prior to processing, all patient's information will be modified to allow for anonymous biobanking and study participation.

If postoperative complications occur, they will be documented in the patient's chart by the treating physicians according to the Clavien-Dindo classification of postoperative complications, as is usual clinical practice in our department. In the presence of infectious complications, evaluation for the presence of SIRS/SEPSIS according to the above-mentioned

## PSP-Study

Department of Surgery  
University Hospital Zurich  
January 2014

criteria will occur. If criteria for SIRS are fulfilled, blood cultures will be taken according to the above-mentioned guidelines to document septic complications. Patient demographic data will be collected via chart analysis by the principle investigator and other participating investigators and will be documented in a central, prospective database (see Supplementary File 1). Study participation ends with patient discharge (Fig. 1).

No commercial analysis kit exists for PSP/PAP analysis. Therefore the separate blood samples will be sent to our in-house research, where direct protein detection through a validated ELISA is performed<sup>22</sup>. Excessive material will be stored and catalogued in a central, anonymous bio-bank (-80°C fridge).

### Statistical Methods

We will compare continuous variables with the Student t, Mann–Whitney U, one-way ANOVA, and Kruskal-Wallis tests. Differences among proportions derived from categorical data will be assessed using the Fisher's Exact or the Pearson  $\chi^2$  tests where appropriate. Paired statistics will be used where appropriate. All p-values will be two-sided and statistical significance will be if  $p \leq 0.05$ . Sensitivity, specificity, accuracy, positive predictive value (PPV), negative predictive value (NPV), positive likelihood ratio (PLR), negative likelihood ratio (NLR), Yuden's index (YI), diagnostic odds ratio (OR), and the receiver operator characteristic (ROC) curve will be calculated. Where appropriate Kaplan-Meier survival curves and survival comparison using the log-rank test will be performed. Where appropriate, data will be presented as mean (SD), median (i.q.r.) and Odds Ratios (95% CI). We will duplicate the blood samples to analyze reproducibility of PSP/PAP measurements and assess the variability by the Pearson's Correlation Coefficient. We will use SPSS Statistics version 20 (SPSS: An IBM company, Chicago IL, 2011) to perform statistical analysis.

### STUDY SITE

Department of Surgery  
University Hospital Zurich  
Raemistrasse 100  
CH-8091 Zurich  
Switzerland

### STUDY STARTING AND ESTIMATED COMPLETION DATE

**First patient recruitment for this study occurred following the approval by the local ethics committee in February 2011. Expected study completion date will be December 2014.**

### ETHICS

This study is conducted in accordance with the principles of the Declaration of Helsinki and "good clinical practice" guidelines. The independent medical ethics committee of the canton of Zurich (Kantonale Ethikkommission Zürich, Switzerland) has approved a previous version of this study protocol. Institution Ethics Board Approval ID: KEKZH-Nr. STV 11-2009.

### DISCUSSION

To date, no perioperative studies exist looking at the value and role of PAP and PSP/reg as postoperative inflammatory serum markers in patients having major abdominal surgery, although it has been demonstrated that PSP/PAP play an important role in various inflammatory events models<sup>7,9,10,13,14</sup>. Additionally, many serum markers have been studied in the hope of discovering new biomarkers, which will aid in recognizing sepsis<sup>3-5,23</sup>.

**PSP-Study**

Department of Surgery  
University Hospital Zurich  
January 2014

1  
2  
3  
4  
5  
6  
7  
8  
9  
10  
11  
12  
13  
14  
15  
16  
17  
18  
19  
20  
21  
22  
23  
24  
25  
26  
27  
28  
29  
30  
31  
32  
33  
34  
35  
36  
37  
38  
39  
40  
41  
42  
43  
44  
45  
46  
47  
48  
49  
50  
51  
52  
53  
54  
55  
56  
57  
58  
59  
60

However, to date no single test exists, which enables physicians to diagnose sepsis and they therefore still have to rely on a combination of physical examination and laboratory findings as well as clinical judgment, hereby potentially delaying adequate treatment. This is crucial, as septic complications following abdominal surgery are treacherous and require early diagnosis and aggressive management due to their high rate of morbidity and mortality<sup>24,25</sup>. Here, PSP/PAP may serve as novel markers for postoperative sepsis, to facilitate early diagnosis of sepsis and hereby hopefully directing resources to those patients at highest risk for death due to septic complications.

**CONCLUSION**

The **PSP-Study** is a prospective, monocentric cohort study evaluating the role of pancreas stone protein (PSP) and pancreatitis associated protein (PAP) as new markers for postoperative infectious complications following abdominal surgery.

**ABBREVIATIONS**

Interleukin-1 (IL-1); interleukin-6 (IL-6); tumor necrosis factor alpha (TNF- $\alpha$ ); C-reactive protein (CRP); procalcitonin (PCT); serum amyloid A (SAA); pancreatic stone peptide (PSP); pancreatic stone protein/regenerating protein (PSP/reg); pancreatitis associated protein (PAP); secretory stress protein (SSP); positive predictive value (PPV); negative predictive value (NPV); positive likelihood ratio (PLR); negative likelihood ratio (NLR); Yuden's index (YI); diagnostic odds ratio (OR); receiver operator characteristic (ROC).

**COMPETING INTERESTS**

The authors report following conflict of interests: Drs. Fisher, Oberkofler, Raptis, Soll, Béchir and Schiesser have reported that no potential conflicts of interest exist with any companies/organizations whose products or services may be discussed in this article. Prof. Graf is the inventor and the University of Zurich owns the patent for PSP/reg as a marker of sepsis.

**AUTHOR CONTRIBUTIONS**

OMF and CEO drafted the manuscript and contributed equally to this work. CEO & RG designed the study protocol in its previous version. DAR performed the study design and calculation of the sample size for the study. All other authors participated in the design of the study and are local investigators. All authors were involved in editing the manuscript. All of the listed authors read and approved the final manuscript.

**FUNDING**

The study is supported by the Gebert Rűf Foundation, Switzerland (GRS-014/12). No funding or assistance is received from commercial organizations.

**STUDY APPROVAL**

This study is approved by the Medical Ethics Commission of the Canton of Zurich, Switzerland via a peer-reviewed process (Kantonale Ethikkommission Zurich; Institution Ethics Board Approval ID: KEKZH-Nr. STV 11-2009).

**ACKNOWLEDGEMENTS**

We would like to thank Martha Bain, Udo Ungethuen, Theresia Reding Graf and Tanja Jakob for their excellent technical assistance. Additionally, we would like to thank the Gebert Rűf Foundation Switzerland, for funding our study (GRS-014/12).



## REFERENCES

1. Gressner AM TL. Proteinstoffwechsel. Lehrbuch der Klinischen Chemie und Pathobiochemie: Schattauer Stuttgart New York, 1989:152.
2. Andus T, Heinrich PC, Castell JC, et al. [Interleukin-6: a key hormone of the acute phase reaction]. Dtsch Med Wochenschr 1989;**114**(44):1710-6.
3. Staehler M, Hammer C, Meiser B, et al. Procalcitonin: a new marker for differential diagnosis of acute rejection and bacterial infection in heart transplantation. Transplantation proceedings 1997;**29**(1-2):584-5.
4. Oberhoffer M, Karzai W, Meier-Hellmann A, et al. Sensitivity and specificity of various markers of inflammation for the prediction of tumor necrosis factor-alpha and interleukin-6 in patients with sepsis. Critical care medicine 1999;**27**(9):1814-8.
5. Welsch T, Muller SA, Ulrich A, et al. C-reactive protein as early predictor for infectious postoperative complications in rectal surgery. International journal of colorectal disease 2007;**22**(12):1499-507.
6. Dimopoulou I, Armaganidis A, Douka E, et al. Tumour necrosis factor-alpha (TNFalpha) and interleukin-10 are crucial mediators in post-operative systemic inflammatory response and determine the occurrence of complications after major abdominal surgery. Cytokine 2007;**37**(1):55-61.
7. Kempainen E, Sand J, Puolakkainen P, et al. Pancreatitis associated protein as an early marker of acute pancreatitis. Gut 1996;**39**(5):675-8.
8. Iovanna J, Orelle B, Keim V, et al. Messenger RNA sequence and expression of rat pancreatitis-associated protein, a lectin-related protein overexpressed during acute experimental pancreatitis. The Journal of biological chemistry 1991;**266**(36):24664-9.

## PSP-Study

Department of Surgery  
University Hospital Zurich  
January 2014

9. Bimmler D, Schiesser M, Perren A, et al. Coordinate regulation of PSP/reg and PAP isoforms as a family of secretory stress proteins in an animal model of chronic pancreatitis. *The Journal of surgical research* 2004;**118**(2):122-35.
10. Graf R, Schiesser M, Scheele GA, et al. A family of 16-kDa pancreatic secretory stress proteins form highly organized fibrillar structures upon tryptic activation. *The Journal of biological chemistry* 2001;**276**(24):21028-38.
11. Iovanna JL, Keim V, Nordback I, et al. Serum levels of pancreatitis-associated protein as indicators of the course of acute pancreatitis. Multicentric Study Group on Acute Pancreatitis. *Gastroenterology* 1994;**106**(3):728-34.
12. Masciotra L, Lechene de la Porte P, Frigerio JM, et al. Immunocytochemical localization of pancreatitis-associated protein in human small intestine. *Digestive diseases and sciences* 1995;**40**(3):519-24.
13. Carroccio A, Iovanna JL, Iacono G, et al. Pancreatitis-associated protein in patients with celiac disease: serum levels and immunocytochemical localization in small intestine. *Digestion* 1997;**58**(2):98-103.
14. Li L, Bachem MG, Zhou S, et al. Pancreatitis-associated protein inhibits human pancreatic stellate cell MMP-1 and -2, TIMP-1 and -2 secretion and RECK expression. *Pancreatology* 2009;**9**(1-2):99-110.
15. Keel M, Harter L, Reding T, et al. Pancreatic stone protein is highly increased during posttraumatic sepsis and activates neutrophil granulocytes. *Critical care medicine* 2009;**37**(5):1642-8.
16. Gukasjan R, Raptis DA, Schulz HU, et al. Pancreatic Stone Protein Predicts Outcome in Patients With Peritonitis in the ICU. *Crit Care Med* 2013.
17. Boeck L, Graf R, Eggimann P, et al. Pancreatic stone protein: a marker of organ failure and outcome in ventilator-associated pneumonia. *Chest* 2011;**140**(4):925-32.

## PSP-Study

Department of Surgery  
University Hospital Zurich  
January 2014

- 1  
2  
3  
4  
5  
6  
7  
8  
9  
10  
11  
12  
13  
14  
15  
16  
17  
18  
19  
20  
21  
22  
23  
24  
25  
26  
27  
28  
29  
30  
31  
32  
33  
34  
35  
36  
37  
38  
39  
40  
41  
42  
43  
44  
45  
46  
47  
48  
49  
50  
51  
52  
53  
54  
55  
56  
57  
58  
59  
60
18. Que YA, Delodder F, Guessous I, et al. Pancreatic stone protein as an early biomarker predicting mortality in a prospective cohort of patients with sepsis requiring ICU management. *Crit Care* 2012;**16**(4):R114.
  19. Dindo D, Demartines N, Clavien PA. Classification of surgical complications: a new proposal with evaluation in a cohort of 6336 patients and results of a survey. *Annals of surgery* 2004;**240**(2):205-13.
  20. Gesellschaft DS. Leitlinien Sepsis. Secondary Leitlinien Sepsis 2010. <http://www.sepsis-gesellschaft.de/cgi-bin/WebObjects/DsgCMS.woa/2/wo/2ewkjkZfYnXP78ZyUCxIGM/2.1.MainWrapper.25.1.1.0.3.1.1.3.7.0.0>.
  21. American College of Chest Physicians/Society of Critical Care Medicine Consensus Conference: definitions for sepsis and organ failure and guidelines for the use of innovative therapies in sepsis. *Critical care medicine* 1992;**20**(6):864-74.
  22. Scherr A, Graf R, Bain M, et al. Pancreatic stone protein predicts positive sputum bacteriology in exacerbations of COPD. *Chest* 2012.
  23. Sankar V, Webster NR. Clinical application of sepsis biomarkers. *Journal of anesthesia* 2012.
  24. Moore LJ, Moore FA, Todd SR, et al. Sepsis in general surgery: the 2005-2007 national surgical quality improvement program perspective. *Arch Surg* 2010;**145**(7):695-700.
  25. Moore LJ, Moore FA, Jones SL, et al. Sepsis in general surgery: a deadly complication. *American journal of surgery* 2009;**198**(6):868-74.



1  
2  
3  
4  
5  
6  
7  
8  
9  
10  
11  
12

**Pancreatic Stone Protein and Pancreatitis-associated Protein:  
Diagnostic Efficacy and Prognostic Value of PSP and PAP as  
Postoperative Markers of Septic Complications in Patients  
Undergoing Abdominal Surgery  
(PSP-Study)**

13  
14 Oliver Maximilian Fisher, MD<sup>1†</sup>, Christian Eugen Oberkofler, MD<sup>1†</sup>, Dimitri Aristotle Raptis,  
15 MD<sup>1</sup>, Christopher Soll, MD<sup>2</sup>, Markus Béchir, MD<sup>3</sup>, Marc Schiesser, MD, MS<sup>4</sup>, Rolf Graf,  
16 PhD<sup>1\*</sup>

17  
18 \* Corresponding Author

19 Prof. Rolf Graf, PhD

20 Department of Surgery

21 Pancreatitis Laboratory DL 34

22 University Hospital Zurich

23 Sternwartstrasse 14

24 CH-8091 Switzerland

25 Phone: +41 44 255 20 71

26 Fax: +41 44 255 50 47

27 Email: rolf.graf@usz.ch  
28  
29  
30

31  
32 <sup>1</sup> Department of Surgery, University Hospital Zurich, Raemistrasse 100, Zurich  
33 CH-8091, Switzerland

34  
35 <sup>2</sup> Department of Surgery, Cantonal Hospital Winterthur, Brauerstrasse 15, Winterthur CH-  
36 8401, Switzerland

37  
38 <sup>3</sup> Surgical Intensive Care Unit, University Hospital Zurich, Raemistrasse 100, Zurich CH-  
39 8091, Switzerland

40  
41 <sup>4</sup> Department of Surgery, Cantonal Hospital St. Gallen, Rorschacherstrasse 95, St. Gallen CH-  
42 9007, Switzerland  
43  
44

45 <sup>†</sup>Equal contributors

46  
47 **Keywords:** pancreatic stone protein, pancreatitis associated protein, secretory stress protein,  
48 abdominal surgery, sepsis

49 **Word count:** 2065  
50  
51  
52  
53  
54  
55  
56  
57  
58  
59  
60

### STRENGTHS:

- Assessment of the novel sepsis biomarkers PSP/PAP in an abdominal surgical study population
- Comparison of PSP/PAP to other acute-phase reaction proteins, regularly measured in surgical study populations
- Evaluation of ability of PSP/PAP to predict infectious complications in patients undergoing major abdominal surgery
- Evaluation of ability of PSP/PAP to predict postoperative sepsis in patients undergoing major abdominal surgery (independently and in comparison to other inflammatory markers)
- External validation of PSP/PAP as a sepsis marker in an independent, prospective patient cohort

### LIMITATIONS:

- Limited ability to generalize to other surgical or medical patient populations
- Limited ability to determine role in guiding treatment decisions
- **Non-blinded, non-randomized single-center observational cohort study**

## PSP-Study

Department of Surgery  
University Hospital Zurich  
January 2014

**BACKGROUND & CURRENT KNOWLEDGE**

The acute-phase reaction is a systemic, non-specific response of the organism to acute inflammation, infection, and also occurs after surgery and the acute-phase reaction is associated with changes in the plasma protein profile<sup>1</sup>. Endothelial cells, fibroblasts and inflammatory cells such as macrophages secrete endogenous immune mediators in the damaged tissue, such as Interleukin-1 (IL-1), interleukin-6 (IL-6), interferon- $\gamma$  and tumor necrosis factor alpha (TNF- $\alpha$ ). In the presence of cortisol this results in the induction of synthesis of various acute-phase proteins stemming from the liver<sup>2</sup>. These include C-reactive protein (CRP), serum amyloid A (SAA), fibrinogen and the complement C3<sup>3</sup>. These proteins can be used as outcome measures of the acute-phase reaction<sup>3</sup> and have been established in clinical practice. Prolonged increase of acute-phase proteins has been shown to be predictive for postoperative infections and septic complications<sup>4,5</sup>. Additionally, studies have shown, that inflammatory markers such as TNF, IL-10 and IL-6 play an important role in the pathogenesis of postoperative SIRS<sup>6</sup>. But acute-phase proteins aren't only synthesized in the liver. It has been shown that the pancreas increases production of pancreatic secretory proteins such as pancreatitis associated protein (PAP) and the pancreatic stone protein/regenerating protein (PSP/reg), known as secretory stress proteins (SSP)<sup>7,8</sup>. In previous work, our group has shown an increased production and secretion of SSPs in stress induction of a murine pancreatitis-model (WBN / Kob rat)<sup>9,10</sup>. Another group was able to demonstrate a correlation between the course of pancreatitis and the induction of pancreatic secretory stress proteins<sup>11</sup>. However, it has also been demonstrated that both PAP and PSP are secreted in other organs, such as the small intestine<sup>12,13</sup>. PAP was increased under inflammatory conditions of the small intestine, especially in celiac disease<sup>13</sup>. More recently, it was demonstrated that PAP is involved in wound healing processes and it's associated metalloproteinases<sup>14</sup>.

In a clinical study in polytrauma patients a significant increase of PSP was observed in those patients who developed infections or sepsis<sup>15</sup>. The same study showed that PSP binds and activates neutrophils, thus acting as an acute-phase protein. The concept that PSP is an early marker of sepsis was further confirmed in subsequent studies on patient populations admitted to the ICU<sup>16-18</sup>.

Therefore it seems clear, that PAP and PSP play an important role in various inflammatory events, not only in pancreatitis but also in sepsis subsequent to other inflammatory diseases. However to date, no perioperative study exist, which looks at the value of these proteins and their role as postoperative inflammatory serum markers following major abdominal surgery. Additionally, differentiating between a simple inflammatory response and a true infectious complication following abdominal surgery still remains a challenge in clinical practice. Here, PAP and PSP/reg may provide valuable information and aid in differentiating between both events in the postoperative setting.

## METHODS & STUDY DESIGN

The **PSP-Study** is a prospective, monocentric cohort study evaluating the role of Pancreatic Stone Protein (PSP) and Pancreatitis Associated Protein (PAP) as new markers for postoperative infectious complications following abdominal surgery. Our study population will consist of patients undergoing liver (n = 30), pancreas (n = 30), upper gastrointestinal tract (n=30) and lower gastrointestinal tract (n=30) surgery as well as patients undergoing emergency abdominal procedures (n=20) and patients undergoing combined renal/pancreas-transplantation (n=10). Hence, a total of 160 patients will be recruited. To ensure adequate data quality, an interim analysis will be performed once 80 patients have been recruited. A power analysis will be performed based on the actual and precise data collected. At interim analysis the potential need to modify the sample size will be investigated. If the external data monitoring committee suggests any changes based on these calculations, the principal investigators will decide on the feasibility of the potential changes and submit a formal addendum to the ethics committee. Unless first approved by the local ethics committee, no changes will be made to the protocol or study design. Any changes to the protocol approved by the ethics committee will be updated at clinicaltrials.gov [NCT01258179].

## STUDY OBJECTIVES & ENDPOINTS

### Study objectives

1. To determine serum levels of PAP and PSP/reg attained from venous samples of patients undergoing major abdominal surgery.
2. To determine an association between PSP/PAP expression and current, routinely measured inflammatory markers (C-reactive protein, procalcitonin, TNF-alpha, IL-6, white blood cell count, thrombocyte count) and compare these with regards to predicting postoperative complications?
3. To determine, whether PSP/PAP levels correlate with postoperative infectious complications and general postoperative complications as graded by the validated Clavien-Dindo classification for postoperative surgical complications<sup>19</sup>?
4. To determine if PSP/PAP can be used as a predictive marker for postoperative infectious complications and sepsis?

### Endpoints

#### Primary Endpoint

- Association of PSP/PAP expression values with patients experiencing infectious postoperative complication according to the Systemic Inflammatory Response Syndrome (SIRS) and Sepsis Criteria of the German Interdisciplinary Association of Intensive and Emergency Medicine (DIVI) and the ACCP/SCCM Consensus Conference Criteria<sup>20,21</sup>.

#### Secondary Endpoints

- Correlation/comparison of PSP/PAP expression values to current markers of inflammation in patients undergoing major abdominal surgery.
- Association of PSP/PAP expression values with overall complication grade according to the Clavien-Dindo score for postoperative complications which includes mortality.
- Association of PSP/PAP expression values with overall postoperative infectious complications and the correlation between PSP/PAP expression values and changes/alterations to management of postoperative complications.

**PSP-Study**

Department of Surgery  
University Hospital Zurich  
January 2014

- Value of serum PSP/PAP levels at time of admission to ICU to predict infection/sepsis outcome during postoperative course including total ICU days and total length of stay.

**Inclusion Criteria**

- Age >18 years old
- Patients scheduled for abdominal surgery including liver, pancreas, upper gastrointestinal tract, lower gastrointestinal tract procedures, patients planned for combined kidney-renal transplantation as well as patients requiring emergency abdominal procedures
- Patients able to provide informed consent

**Exclusion Criteria**

- Age < 18 years old
- Patients unable to provide informed consent

**SIRS/Sepsis Criteria****SIRS**

- Fever  $\geq 38.0^{\circ}\text{C}$  or hypothermia  $\leq 36.0^{\circ}\text{C}$  measured rectal, intravascular or within the bladder
- Tachycardia  $\geq 90/\text{min}$
- Tachypnea  $\geq 20/\text{min}$  or hyperventilation (measured via arterial blood gas analysis showing a  $\text{PaCO}_2 \leq 4.3\text{kPa} / 33\text{mmHg}$ )
- Leukocytosis  $\geq 12.000/\text{mm}^3$  or leukopenia  $\leq 4.000/\text{mm}^3$  or  $\geq 10\%$  of immature neutrophils upon differential blood analysis

At least two of the above must be fulfilled to diagnose SIRS<sup>20,21</sup>

**Sepsis**

- Identified microbiological infection (e.g. positive blood cultures)
- At least two of the above mentioned SIRS criteria

**DATA COLLECTION & STATISTICAL METHODOLOGY****Data Collection**

Patients will be recruited on the day before surgery or upon admission for emergency abdominal surgery. They will be evaluated for inclusion criteria and informed about the study as well as the possibility of study participation. Once the informed consent form has been read, understood and signed, baseline blood samples will be obtained and sent in for routine as well as separate analysis of PSP/PAP levels. Following surgery, daily blood samples will be obtained and analyzed for the sample values. Blood samples will be marked with patient's names, date of birth and date of sample extraction for identification purposes during transportation to our laboratory. However, following arrival of the blood sample in our laboratory and prior to processing, all patient's information will be modified to allow for anonymous biobanking and study participation.

If postoperative complications occur, they will be documented in the patient's chart by the treating physicians according to the Clavien-Dindo classification of postoperative complications, as is usual clinical practice in our department. In the presence of infectious complications, evaluation for the presence of SIRS/SEPSIS according to the above-mentioned

**PSP-Study**

Department of Surgery  
University Hospital Zurich  
January 2014

criteria will occur. If criteria for SIRS are fulfilled, blood cultures will be taken according to the above-mentioned guidelines to document septic complications. Patient demographic data will be collected via chart analysis by the principle investigator and other participating investigators and will be documented in a central, prospective database (see Supplementary File 1). Study participation ends with patient discharge (Fig. 1).

No commercial analysis kit exists for PSP/PAP analysis. Therefore the separate blood samples will be sent to our in-house research, where direct protein detection through a validated ELISA is performed<sup>22</sup>. Excessive material will be stored and catalogued in a central, anonymous bio-bank (-80°C fridge).

**Statistical Methods**

We will compare continuous variables with the Student t, Mann–Whitney U, one-way ANOVA, and Kruskal-Wallis tests. Differences among proportions derived from categorical data will be assessed using the Fisher's Exact or the Pearson  $\chi^2$  tests where appropriate. Paired statistics will be used where appropriate. All p-values will be two-sided and statistical significance will be if  $p \leq 0.05$ . Sensitivity, specificity, accuracy, positive predictive value (PPV), negative predictive value (NPV), positive likelihood ratio (PLR), negative likelihood ratio (NLR), Yuden's index (YI), diagnostic odds ratio (OR), and the receiver operator characteristic (ROC) curve will be calculated. Where appropriate Kaplan-Meier survival curves and survival comparison using the log-rank test will be performed. Where appropriate, data will be presented as mean (SD), median (i.q.r.) and Odds Ratios (95% CI). We will duplicate the blood samples to analyze reproducibility of PSP/PAP measurements and assess the variability by the Pearson's Correlation Coefficient. We will use SPSS Statistics version 20 (SPSS: An IBM company, Chicago IL, 2011) to perform statistical analysis.

**STUDY SITE**

Department of Surgery  
University Hospital Zurich  
Raemistrasse 100  
CH-8091 Zurich  
Switzerland

**STUDY STARTING AND ESTIMATED COMPLETION DATE**

**First patient recruitment for this study occurred following the approval by the local ethics committee in February 2011. Expected study completion date will be December 2014.**

**ETHICS**

This study is conducted in accordance with the principles of the Declaration of Helsinki and "good clinical practice" guidelines. The independent medical ethics committee of the canton of Zurich (Kantonale Ethikkommission Zürich, Switzerland) has approved a previous version of this study protocol. Institution Ethics Board Approval ID: KEKZH-Nr. STV 11-2009.

**DISCUSSION**

To date, no perioperative studies exist looking at the value and role of PAP and PSP/reg as postoperative inflammatory serum markers in patients having major abdominal surgery, although it has been demonstrated that PSP/PAP play an important role in various inflammatory events models<sup>7,9,10,13,14</sup>. Additionally, many serum markers have been studied in the hope of discovering new biomarkers, which will aid in recognizing sepsis<sup>3-5,23</sup>.



**PSP-Study**

Department of Surgery  
University Hospital Zurich  
January 2014

However, to date no single test exists, which enables physicians to diagnose sepsis and they therefore still have to rely on a combination of physical examination and laboratory findings as well as clinical judgment, hereby potentially delaying adequate treatment. This is crucial, as septic complications following abdominal surgery are treacherous and require early diagnosis and aggressive management due to their high rate of morbidity and mortality<sup>24,25</sup>. Here, PSP/PAP may serve as novel markers for postoperative sepsis, to facilitate early diagnosis of sepsis and hereby hopefully directing resources to those patients at highest risk for death due to septic complications.

**CONCLUSION**

The **PSP-Study** is a prospective, monocentric cohort study evaluating the role of pancreas stone protein (PSP) and pancreatitis associated protein (PAP) as new markers for postoperative infectious complications following abdominal surgery.

**ABBREVIATIONS**

Interleukin-1 (IL-1); interleukin-6 (IL-6); tumor necrosis factor alpha (TNF- $\alpha$ ); C-reactive protein (CRP); procalcitonin (PCT); serum amyloid A (SAA); pancreatic stone peptide (PSP); pancreatic stone protein/regenerating protein (PSP/reg); pancreatitis associated protein (PAP); secretory stress protein (SSP); positive predictive value (PPV); negative predictive value (NPV); positive likelihood ratio (PLR); negative likelihood ratio (NLR); Yuden's index (YI); diagnostic odds ratio (OR); receiver operator characteristic (ROC).

**COMPETING INTERESTS**

The authors report following conflict of interests: Drs. Fisher, Oberkofler, Raptis, Soll, Béchir and Schiesser have reported that no potential conflicts of interest exist with any companies/organizations whose products or services may be discussed in this article. Prof. Graf is the inventor and the University of Zurich owns the patent for PSP/reg as a marker of sepsis.

**AUTHOR CONTRIBUTIONS**

OMF and CEO drafted the manuscript and contributed equally to this work. CEO & RG designed the study protocol in its previous version. DAR performed the study design and calculation of the sample size for the study. All other authors participated in the design of the study and are local investigators. All authors were involved in editing the manuscript. All of the listed authors read and approved the final manuscript.

**FUNDING**

The study is supported by the Gebert Rűf Foundation, Switzerland (GRS-014/12). No funding or assistance is received from commercial organizations.

**STUDY APPROVAL**

This study is approved by the Medical Ethics Commission of the Canton of Zurich, Switzerland via a peer-reviewed process (Kantonale Ethikkommission Zurich; Institution Ethics Board Approval ID: KEKZH-Nr. STV 11-2009).

**ACKNOWLEDGEMENTS**

We would like to thank Martha Bain, Udo Ungethuen, Theresia Reding Graf and Tanja Jakob for their excellent technical assistance. Additionally, we would like to thank the Gebert Rűf Foundation Switzerland, for funding our study (GRS-014/12).

## REFERENCES

1. Gressner AM TL. Proteinstoffwechsel. Lehrbuch der Klinischen Chemie und Pathobiochemie: Schattauer Stuttgart New York, 1989:152.
2. Andus T, Heinrich PC, Castell JC, et al. [Interleukin-6: a key hormone of the acute phase reaction]. Dtsch Med Wochenschr 1989;**114**(44):1710-6.
3. Staehler M, Hammer C, Meiser B, et al. Procalcitonin: a new marker for differential diagnosis of acute rejection and bacterial infection in heart transplantation. Transplantation proceedings 1997;**29**(1-2):584-5.
4. Oberhoffer M, Karzai W, Meier-Hellmann A, et al. Sensitivity and specificity of various markers of inflammation for the prediction of tumor necrosis factor-alpha and interleukin-6 in patients with sepsis. Critical care medicine 1999;**27**(9):1814-8.
5. Welsch T, Muller SA, Ulrich A, et al. C-reactive protein as early predictor for infectious postoperative complications in rectal surgery. International journal of colorectal disease 2007;**22**(12):1499-507.
6. Dimopoulou I, Armaganidis A, Douka E, et al. Tumour necrosis factor-alpha (TNFalpha) and interleukin-10 are crucial mediators in post-operative systemic inflammatory response and determine the occurrence of complications after major abdominal surgery. Cytokine 2007;**37**(1):55-61.
7. Kempainen E, Sand J, Puolakkainen P, et al. Pancreatitis associated protein as an early marker of acute pancreatitis. Gut 1996;**39**(5):675-8.
8. Iovanna J, Orelle B, Keim V, et al. Messenger RNA sequence and expression of rat pancreatitis-associated protein, a lectin-related protein overexpressed during acute experimental pancreatitis. The Journal of biological chemistry 1991;**266**(36):24664-9.



## PSP-Study

Department of Surgery  
University Hospital Zurich  
January 2014

9. Bimmler D, Schiesser M, Perren A, et al. Coordinate regulation of PSP/reg and PAP isoforms as a family of secretory stress proteins in an animal model of chronic pancreatitis. *The Journal of surgical research* 2004;**118**(2):122-35.
10. Graf R, Schiesser M, Scheele GA, et al. A family of 16-kDa pancreatic secretory stress proteins form highly organized fibrillar structures upon tryptic activation. *The Journal of biological chemistry* 2001;**276**(24):21028-38.
11. Iovanna JL, Keim V, Nordback I, et al. Serum levels of pancreatitis-associated protein as indicators of the course of acute pancreatitis. Multicentric Study Group on Acute Pancreatitis. *Gastroenterology* 1994;**106**(3):728-34.
12. Masciotra L, Lechene de la Porte P, Frigerio JM, et al. Immunocytochemical localization of pancreatitis-associated protein in human small intestine. *Digestive diseases and sciences* 1995;**40**(3):519-24.
13. Carroccio A, Iovanna JL, Iacono G, et al. Pancreatitis-associated protein in patients with celiac disease: serum levels and immunocytochemical localization in small intestine. *Digestion* 1997;**58**(2):98-103.
14. Li L, Bachem MG, Zhou S, et al. Pancreatitis-associated protein inhibits human pancreatic stellate cell MMP-1 and -2, TIMP-1 and -2 secretion and RECK expression. *Pancreatology* 2009;**9**(1-2):99-110.
15. Keel M, Harter L, Reding T, et al. Pancreatic stone protein is highly increased during posttraumatic sepsis and activates neutrophil granulocytes. *Critical care medicine* 2009;**37**(5):1642-8.
16. Gukasjan R, Raptis DA, Schulz HU, et al. Pancreatic Stone Protein Predicts Outcome in Patients With Peritonitis in the ICU. *Crit Care Med* 2013.
17. Boeck L, Graf R, Eggimann P, et al. Pancreatic stone protein: a marker of organ failure and outcome in ventilator-associated pneumonia. *Chest* 2011;**140**(4):925-32.

## PSP-Study

Department of Surgery  
University Hospital Zurich  
January 2014

18. Que YA, Delodder F, Guessous I, et al. Pancreatic stone protein as an early biomarker predicting mortality in a prospective cohort of patients with sepsis requiring ICU management. *Crit Care* 2012;**16**(4):R114.
19. Dindo D, Demartines N, Clavien PA. Classification of surgical complications: a new proposal with evaluation in a cohort of 6336 patients and results of a survey. *Annals of surgery* 2004;**240**(2):205-13.
20. Gesellschaft DS. Leitlinien Sepsis. Secondary Leitlinien Sepsis 2010. <http://www.sepsis-gesellschaft.de/cgi-bin/WebObjects/DsgCMS.woa/2/wo/2ewkjkZfYnXP78ZyUCxIGM/2.1.MainWrapper.25.1.1.0.3.1.1.3.7.0.0>.
21. American College of Chest Physicians/Society of Critical Care Medicine Consensus Conference: definitions for sepsis and organ failure and guidelines for the use of innovative therapies in sepsis. *Critical care medicine* 1992;**20**(6):864-74.
22. Scherr A, Graf R, Bain M, et al. Pancreatic stone protein predicts positive sputum bacteriology in exacerbations of COPD. *Chest* 2012.
23. Sankar V, Webster NR. Clinical application of sepsis biomarkers. *Journal of anesthesia* 2012.
24. Moore LJ, Moore FA, Todd SR, et al. Sepsis in general surgery: the 2005-2007 national surgical quality improvement program perspective. *Arch Surg* 2010;**145**(7):695-700.
25. Moore LJ, Moore FA, Jones SL, et al. Sepsis in general surgery: a deadly complication. *American journal of surgery* 2009;**198**(6):868-74.

# Patient Case Report Form - PSP-Study

## Patient Baseline Data

Patient Study Number

Birth date (dd/mm/yyyy)

Gender

Male  Female

Ethnicity

Caucasian

Asian

African

Other/mix \_\_\_\_\_

Height (m)

Weight (kg)

BMI (body-mass-index kg/m<sup>2</sup>)

Underlying Disease / Reason for Admission

Malignant

Yes

No

Admission Date (dd/mm/yyyy)

# Patient Case Report Form - PSP-Study

## Operation Data

Operation Date (dd/mm/yyyy)

Operation Type

- General Surgery
- Emergency Abdominal Surgery
- (Major) Endocrine Surgery
- Upper-Gastrointestinal Surgery
- Lower-Gastrointestinal Surgery
- Hepato-Pancreato-Biliary Surgery
- Transplantation
- Undefined

Operation (Text description)

## Patient Case Report Form - PSP-Study

### Hospitalisation and Follow-Up Data

**Immediate Postoperative Intensive Care Unit**

|     |  |                          |
|-----|--|--------------------------|
| Yes |  | <input type="checkbox"/> |
| No  |  | <input type="checkbox"/> |

**ICU Length of Stay (immediate postop)** \_\_\_\_\_

**Complications**

|     |  |                          |
|-----|--|--------------------------|
| Yes |  | <input type="checkbox"/> |
| No  |  | <input type="checkbox"/> |

**Complication Date (dd/mm/yyyy)**  
(= postoperative Day X)

**Complication Grade (according to Clavien-Dindo Score)**

|                                                    |  |                          |
|----------------------------------------------------|--|--------------------------|
| No complications                                   |  | <input type="checkbox"/> |
| Grade I                                            |  | <input type="checkbox"/> |
| Grade II (medications only)                        |  | <input type="checkbox"/> |
| Grade IIIa (intervention under local anesthetic)   |  | <input type="checkbox"/> |
| Grade IIIb (intervention under general anesthesia) |  | <input type="checkbox"/> |
| Grade IVa (organ failure, admission to ICU)        |  | <input type="checkbox"/> |
| Grade IVb (multi-organ failure, admission to ICU)  |  | <input type="checkbox"/> |
| Grade V (Death)                                    |  | <input type="checkbox"/> |

**Type of Complication (text)**

|    |                                       |                                       |                          |
|----|---------------------------------------|---------------------------------------|--------------------------|
| 1  |                                       |                                       |                          |
| 2  |                                       |                                       |                          |
| 3  |                                       |                                       |                          |
| 4  | <b>Postoperative SIRS</b>             | Yes                                   | <input type="checkbox"/> |
| 5  |                                       | No                                    | <input type="checkbox"/> |
| 6  |                                       |                                       |                          |
| 7  |                                       |                                       |                          |
| 8  | <b>Postoperative Sepsis</b>           | Yes                                   | <input type="checkbox"/> |
| 9  |                                       | No                                    | <input type="checkbox"/> |
| 10 |                                       |                                       |                          |
| 11 |                                       |                                       |                          |
| 12 | <b>Blood Cultures Positive</b>        | Yes                                   | <input type="checkbox"/> |
| 13 |                                       | No                                    | <input type="checkbox"/> |
| 14 |                                       |                                       |                          |
| 15 |                                       |                                       |                          |
| 16 | <b>Type of Microbiota</b>             | Gram positive                         | <input type="checkbox"/> |
| 17 |                                       | Gram negative                         | <input type="checkbox"/> |
| 18 |                                       | Fungi                                 | <input type="checkbox"/> |
| 19 |                                       | Viral                                 | <input type="checkbox"/> |
| 20 |                                       | Please specify microbiota type: _____ | <input type="checkbox"/> |
| 21 |                                       |                                       |                          |
| 22 |                                       |                                       |                          |
| 23 |                                       |                                       |                          |
| 24 | <b>Preoperative Antibiotics (AB)?</b> | Yes                                   | <input type="checkbox"/> |
| 25 |                                       | No                                    | <input type="checkbox"/> |
| 26 |                                       |                                       |                          |
| 27 |                                       |                                       |                          |
| 28 | <b>Preoperative AB-Type</b>           | Co-Amoxicillin (or similar)           | <input type="checkbox"/> |
| 29 | (multiple choices possible)           | Cephalosporin                         | <input type="checkbox"/> |
| 30 |                                       | Chinolone (Ciproxin and similar)      | <input type="checkbox"/> |
| 31 |                                       | Metronidazole                         | <input type="checkbox"/> |
| 32 |                                       | Piperacillin/Tazobactam               | <input type="checkbox"/> |
| 33 |                                       | Carbapenem                            | <input type="checkbox"/> |
| 34 |                                       | Vancomycin/Daptomycin                 | <input type="checkbox"/> |
| 35 |                                       | Other, please indicate: _____         | <input type="checkbox"/> |
| 36 |                                       |                                       |                          |
| 37 |                                       |                                       |                          |
| 38 |                                       |                                       |                          |
| 39 |                                       |                                       |                          |
| 40 |                                       |                                       |                          |
| 41 |                                       |                                       |                          |
| 42 |                                       |                                       |                          |
| 43 |                                       |                                       |                          |
| 44 |                                       |                                       |                          |
| 45 |                                       |                                       |                          |
| 46 |                                       |                                       |                          |
| 47 |                                       |                                       |                          |

|    |                                                 |                                    |                          |
|----|-------------------------------------------------|------------------------------------|--------------------------|
| 1  |                                                 |                                    |                          |
| 2  |                                                 |                                    |                          |
| 3  |                                                 |                                    |                          |
| 4  | <b>Postoperative AB-Prophylaxis?</b>            | Yes                                | <input type="checkbox"/> |
| 5  |                                                 | No                                 | <input type="checkbox"/> |
| 6  |                                                 |                                    |                          |
| 7  | <b>Postoperative Prophylaxis AB-Type</b>        | Co-Amoxicillin (or similar)        | <input type="checkbox"/> |
| 8  | (multiple choices possible)                     | Cephalosporin                      | <input type="checkbox"/> |
| 9  |                                                 | Chinolone (Ciproxin and similar)   | <input type="checkbox"/> |
| 10 |                                                 | Metronidazole                      | <input type="checkbox"/> |
| 11 |                                                 | Piperacillin/Tazobactam            | <input type="checkbox"/> |
| 12 |                                                 | Carbapenem                         | <input type="checkbox"/> |
| 13 |                                                 | Vancomycin/Daptomycin              | <input type="checkbox"/> |
| 14 |                                                 | Other, please indicate: _____      | <input type="checkbox"/> |
| 15 |                                                 |                                    |                          |
| 16 |                                                 |                                    |                          |
| 17 |                                                 |                                    |                          |
| 18 | <b>Postoperative AB-Therapy?</b>                | Yes                                | <input type="checkbox"/> |
| 19 |                                                 | No                                 | <input type="checkbox"/> |
| 20 |                                                 |                                    |                          |
| 21 |                                                 |                                    |                          |
| 22 |                                                 |                                    |                          |
| 23 | <b>Indication for Start of Postoperative AB</b> | Fever                              | <input type="checkbox"/> |
| 24 |                                                 | Increasing inflammatory parameters | <input type="checkbox"/> |
| 25 |                                                 | SIRS (empirical)                   | <input type="checkbox"/> |
| 26 |                                                 | Sepsis (empirical)                 | <input type="checkbox"/> |
| 27 |                                                 | Sepsis (directed therapy)          | <input type="checkbox"/> |
| 28 |                                                 | Other, please indicate: _____      | <input type="checkbox"/> |
| 29 |                                                 |                                    |                          |
| 30 |                                                 |                                    |                          |
| 31 |                                                 |                                    |                          |
| 32 | <b>Date Start of Postoperative AB-Therapy?</b>  |                                    |                          |
| 33 | (= postoperative Day X); (dd/mm/yyyy)           |                                    |                          |
| 34 |                                                 |                                    |                          |
| 35 |                                                 |                                    |                          |
| 36 | <b>Postoperative AB-Therapy Type</b>            | Co-Amoxicillin (or similar)        | <input type="checkbox"/> |
| 37 | (multiple choices possible)                     | Cephalosporin                      | <input type="checkbox"/> |
| 38 |                                                 | Chinolone (Ciproxin and similar)   | <input type="checkbox"/> |
| 39 |                                                 | Metronidazole                      | <input type="checkbox"/> |
| 40 |                                                 |                                    |                          |
| 41 |                                                 |                                    |                          |
| 42 |                                                 |                                    |                          |
| 43 |                                                 |                                    |                          |
| 44 |                                                 |                                    |                          |
| 45 |                                                 |                                    |                          |
| 46 |                                                 |                                    |                          |
| 47 |                                                 |                                    |                          |

|    |                                                |                                         |                          |
|----|------------------------------------------------|-----------------------------------------|--------------------------|
| 1  |                                                |                                         |                          |
| 2  |                                                |                                         |                          |
| 3  |                                                |                                         |                          |
| 4  |                                                | Piperacillin/Tazobactam                 | <input type="checkbox"/> |
| 5  |                                                | Carbapenem                              | <input type="checkbox"/> |
| 6  |                                                | Vancomycin/Daptomycin                   | <input type="checkbox"/> |
| 7  |                                                | Other, please indicate: _____           | <input type="checkbox"/> |
| 8  |                                                |                                         |                          |
| 9  |                                                |                                         |                          |
| 10 | <b>AB Change / Escalation</b>                  | Yes                                     | <input type="checkbox"/> |
| 11 |                                                | No                                      | <input type="checkbox"/> |
| 12 |                                                |                                         |                          |
| 13 |                                                |                                         |                          |
| 14 | <b>Date AB Change / Escalation</b>             |                                         |                          |
| 15 | <b>(= postoperative Day X); (dd/mm/yyyy)</b>   |                                         |                          |
| 16 |                                                |                                         |                          |
| 17 |                                                |                                         |                          |
| 18 | <b>Indication for AB Change/Escalation</b>     | Fever                                   | <input type="checkbox"/> |
| 19 |                                                | Increasing inflammatory parameters      | <input type="checkbox"/> |
| 20 |                                                | SIRS (empirical)                        | <input type="checkbox"/> |
| 21 |                                                | Sepsis (empirical)                      | <input type="checkbox"/> |
| 22 |                                                | Sepsis (directed therapy)               | <input type="checkbox"/> |
| 23 |                                                | Microbiology Report with AB-Resistogram | <input type="checkbox"/> |
| 24 |                                                | Other, please indicate: _____           | <input type="checkbox"/> |
| 25 |                                                |                                         |                          |
| 26 |                                                |                                         |                          |
| 27 |                                                |                                         |                          |
| 28 |                                                |                                         |                          |
| 29 | <b>Date AB STOP (regardless of indication)</b> |                                         |                          |
| 30 | <b>(= postoperative Day X); (dd/mm/yyyy)</b>   |                                         |                          |
| 31 |                                                |                                         |                          |
| 32 |                                                |                                         |                          |
| 33 | <b>Antifungal Therapy</b>                      | Yes                                     | <input type="checkbox"/> |
| 34 |                                                | No                                      | <input type="checkbox"/> |
| 35 |                                                |                                         |                          |
| 36 |                                                |                                         |                          |
| 37 | <b>Preoperative Antifungal Therapy</b>         | Yes                                     | <input type="checkbox"/> |
| 38 |                                                | No                                      | <input type="checkbox"/> |
| 39 |                                                |                                         |                          |
| 40 |                                                |                                         |                          |
| 41 |                                                |                                         |                          |
| 42 |                                                |                                         |                          |
| 43 |                                                |                                         |                          |
| 44 |                                                |                                         |                          |
| 45 |                                                |                                         |                          |
| 46 |                                                |                                         |                          |
| 47 |                                                |                                         |                          |



|                                                   |                               |                          |
|---------------------------------------------------|-------------------------------|--------------------------|
| <b>Preoperative Antifungal Therapy Type</b>       | Fluconazole                   | <input type="checkbox"/> |
|                                                   | Itraconazole                  | <input type="checkbox"/> |
|                                                   | Voriconazole                  | <input type="checkbox"/> |
|                                                   | Caspofungin                   | <input type="checkbox"/> |
|                                                   | Ampho B                       | <input type="checkbox"/> |
|                                                   | Other, please indicate: _____ | <input type="checkbox"/> |
| <b>Postoperative Antifungal Prophylaxis</b>       | Yes                           | <input type="checkbox"/> |
|                                                   | No                            | <input type="checkbox"/> |
| <b>Postoperative Antifungal Prophylaxis Type</b>  | Fluconazole                   | <input type="checkbox"/> |
|                                                   | Itraconazole                  | <input type="checkbox"/> |
|                                                   | Voriconazole                  | <input type="checkbox"/> |
|                                                   | Caspofungin                   | <input type="checkbox"/> |
|                                                   | Ampho B                       | <input type="checkbox"/> |
|                                                   | Other, please indicate: _____ | <input type="checkbox"/> |
| <b>Postoperative Antifungal Therapy</b>           | Yes                           | <input type="checkbox"/> |
|                                                   | No                            | <input type="checkbox"/> |
| <b>Postoperative Antifungal Therapy Type</b>      | Fluconazole                   | <input type="checkbox"/> |
|                                                   | Itraconazole                  | <input type="checkbox"/> |
|                                                   | Voriconazole                  | <input type="checkbox"/> |
|                                                   | Caspofungin                   | <input type="checkbox"/> |
|                                                   | Ampho B                       | <input type="checkbox"/> |
|                                                   | Other, please indicate: _____ | <input type="checkbox"/> |
| <b>Postoperative Antifungal Change/Escalation</b> | Yes                           | <input type="checkbox"/> |
|                                                   | No                            | <input type="checkbox"/> |

1  
2  
3  
4  
5  
6  
7  
8  
9  
10  
11  
12  
13  
14  
15  
16  
17  
18  
19  
20  
21  
22  
23  
24  
25  
26  
27  
28  
29  
30  
31  
32  
33  
34  
35  
36  
37  
38  
39  
40  
41  
42  
43  
44  
45  
46  
47

|                                                                    |                                         |                          |
|--------------------------------------------------------------------|-----------------------------------------|--------------------------|
| <b>Indication for Antifungal Change/Escalation</b>                 | Fever                                   | <input type="checkbox"/> |
|                                                                    | Increasing inflammatory parameters      | <input type="checkbox"/> |
|                                                                    | SIRS (empirical)                        | <input type="checkbox"/> |
|                                                                    | Sepsis (empirical)                      | <input type="checkbox"/> |
|                                                                    | Sepsis (directed therapy)               | <input type="checkbox"/> |
|                                                                    | Microbiology Report with AB-Resistogram | <input type="checkbox"/> |
|                                                                    | Other, please indicate: _____           | <input type="checkbox"/> |
| <b>Date Antifungal Therapy Change/Escalation (dd/mm/yyyy)</b>      |                                         |                          |
| <b>Date Antifungals STOP (= postoperative Day X); (dd/mm/yyyy)</b> |                                         |                          |
| <b>Re-Operation?</b>                                               | Yes                                     | <input type="checkbox"/> |
|                                                                    | No                                      | <input type="checkbox"/> |
| <b>Re-Operation Date (dd/mm/yyyy) (= postoperative Day X)</b>      |                                         |                          |
| <b>Re-Operation Type (text)</b>                                    |                                         |                          |
| <b>Re-Operation times</b>                                          | 1                                       | <input type="checkbox"/> |
|                                                                    | 2                                       | <input type="checkbox"/> |
|                                                                    | 3                                       | <input type="checkbox"/> |
|                                                                    | 4                                       | <input type="checkbox"/> |
|                                                                    | 5                                       | <input type="checkbox"/> |
|                                                                    | >5                                      | <input type="checkbox"/> |

1  
2  
3  
4  
5 **Pre-Reoperation Diagnostics?** Yes

6 No

7  
8 **Pre-Reoperation Diagnostisc Type** Conventional X-ray

9 CT-Scan

10 Other, please indicate: \_\_\_\_\_

11  
12  
13  
14 **Postoperative Intervention (e.g. drain-** Yes   
15 **placement through radiologist etc.)** No

16  
17  
18 **Postoperative Intervention Date**  
19 **(= postoperative Day X); (dd/mm/yyyy)**

20  
21 **Postoperative Intervention Type (text)**

22  
23  
24 **Postoperative Intervention Times** 1   
25 2   
26 3   
27 4   
28 5   
29 >5

30  
31  
32  
33  
34 **ICU-Readmission** Yes   
35 No

36  
37  
38 **ICU-Readmission Date (dd/mm/yyyy)**

39  
40  
41  
42  
43  
44  
45  
46  
47

1  
2  
3  
4  
5  
6  
7  
8  
9  
10  
11  
12  
13  
14  
15  
16  
17  
18  
19  
20  
21  
22  
23  
24  
25  
26  
27  
28  
29  
30  
31  
32  
33  
34  
35  
36  
37  
38  
39  
40  
41  
42  
43  
44  
45  
46  
47

|                                             |                           |                          |
|---------------------------------------------|---------------------------|--------------------------|
| <b>ICU-Readmission LOS</b>                  | _____                     |                          |
| <b>Hospital Discharge</b>                   | Yes                       | <input type="checkbox"/> |
|                                             | No                        | <input type="checkbox"/> |
|                                             | If no, please indicate if | <input type="checkbox"/> |
|                                             | a) in hospital death      | <input type="checkbox"/> |
|                                             | b) other reason           | <input type="checkbox"/> |
| <b>Hospital Discharge Date (dd/mm/yyyy)</b> |                           |                          |
| <b>Hospital Total Length of Stay (LOS)</b>  | _____                     |                          |

For peer review only

## Patient Case Report Form - PSP-Study

| Laboratory Values                   |                           |                          |
|-------------------------------------|---------------------------|--------------------------|
| <b>White Blood Cell Count (WBC)</b> | WBO 0 (Baseline)          | <input type="checkbox"/> |
|                                     | WBC 1 (Day 1)             | <input type="checkbox"/> |
|                                     | WBC 2                     | <input type="checkbox"/> |
|                                     | .....                     |                          |
|                                     | WBC XY (Day of discharge) | <input type="checkbox"/> |
| <b>C-Reactive Protein</b>           | CRP 0 (Baseline)          | <input type="checkbox"/> |
|                                     | CRP 1                     | <input type="checkbox"/> |
|                                     | CRP 2                     | <input type="checkbox"/> |
|                                     | ....                      |                          |
|                                     | CRP XY                    | <input type="checkbox"/> |
| <b>Procalcitonin</b>                | PCT 0                     | <input type="checkbox"/> |
|                                     | PCT 1                     | <input type="checkbox"/> |
|                                     | PCT 2                     | <input type="checkbox"/> |
|                                     | ...                       |                          |
|                                     | PCT XY                    | <input type="checkbox"/> |
| <b>Thrombocytes</b>                 | TC 0                      | <input type="checkbox"/> |
|                                     | TC 1                      | <input type="checkbox"/> |
|                                     | TC 2                      | <input type="checkbox"/> |
|                                     | ...                       |                          |
|                                     | TC XY                     | <input type="checkbox"/> |

1  
2  
3  
4  
5  
6  
7  
8  
9  
10  
11  
12  
13  
14  
15  
16  
17  
18  
19  
20  
21  
22  
23  
24  
25  
26  
27  
28  
29  
30  
31  
32  
33  
34  
35  
36  
37  
38  
39  
40  
41  
42  
43  
44  
45  
46  
47

1  
2  
3  
4  
5  
6  
7  
8  
9  
10  
11  
12  
13  
14  
15  
16  
17  
18  
19  
20  
21  
22  
23  
24  
25  
26  
27  
28  
29  
30  
31  
32  
33  
34  
35  
36  
37  
38  
39  
40  
41  
42  
43  
44  
45  
46  
47

|                                        |        |                          |
|----------------------------------------|--------|--------------------------|
| <b>Pancreatic Stone Protein</b>        | PSP 0  | <input type="checkbox"/> |
|                                        | PSP 1  | <input type="checkbox"/> |
|                                        | PSP 2  | <input type="checkbox"/> |
|                                        | ...    |                          |
|                                        | PSP XY | <input type="checkbox"/> |
| <b>Pancreatitis-associated Protein</b> | PAP 0  | <input type="checkbox"/> |
|                                        | PAP 1  | <input type="checkbox"/> |
|                                        | PAP 2  | <input type="checkbox"/> |
|                                        | ...    |                          |
|                                        | PAP XY | <input type="checkbox"/> |

For peer review only

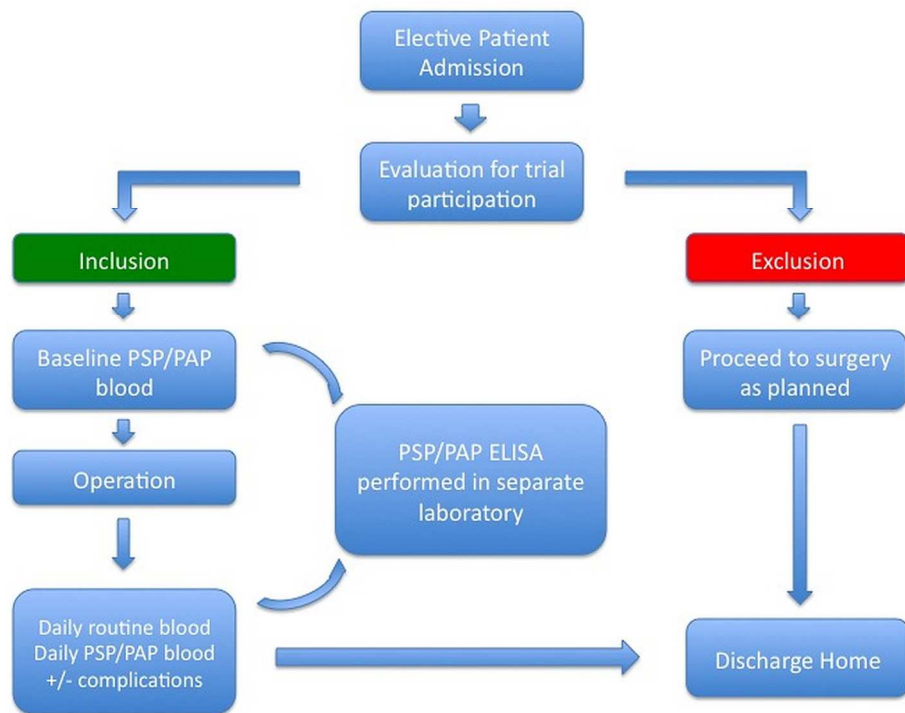

Figure 1. Flow chart of patient recruitment and study participation.  
119x90mm (300 x 300 DPI)

Review only

1  
2  
3  
4  
5  
6  
7  
8  
9  
10  
11  
12  
13  
14  
15  
16  
17  
18  
19  
20  
21  
22  
23  
24  
25  
26  
27  
28  
29  
30  
31  
32  
33  
34  
35  
36  
37  
38  
39  
40  
41  
42  
43  
44  
45  
46  
47  
48  
49  
50  
51  
52  
53  
54  
55  
56  
57  
58  
59  
60
